# Supplementary material
Source: PubMed Central journal article supplement (PMC4121812)
Supplement: 1323025111_pnas.1323025111.sapp.pdf [file 1323025111_pnas.1323025111.sapp.pdf]

## Supplemental Results and Discussion

*Francisella* species are extremely resistant to polymyxin in comparison to other bacteria. We therefore set out to identify genes necessary for *F. novicida* polymyxin resistance. We initiated a screen of 470 transposon mutants from a library (1) representing 229 genes that have previously been identified as necessary for virulence *in vivo* and/or intracellular replication in mammalian cells. Each mutant was grown overnight in the presence of polymyxin B, and compared to wild-type. Mutants that failed to reach at least 75% of wild-type growth were deemed to have mutations in genes required for complete fitness in the presence of polymyxin (Supplemental Tables 1 and 2).

We identified 120 genes as playing roles in *F. novicida* resistance to polymyxin. The majority of these are categorized as having Unknown Function by COG analysis, while the remainder are primarily grouped into pathways necessary for the generation of envelope structures or within metabolic pathways that can act upstream of envelope biogenesis and modification (Supplemental Figure 2). Resistance to polymyxin is often mediated by alterations to the structure of lipid A and O-antigen, components of lipopolysaccharide (LPS) in the bacterial outer membrane. Notably, we identified *FTN\_0544*, *FTN\_0545*, and *lpxE* which have roles in lipid A modification and have previously been implicated in polymyxin resistance (2-4), providing validation for the results of the screen (Supplemental Table 1). Additionally, *wbtD*, *wbtF*, and *wbtH*, which are part of the O-antigen biosynthetic machinery were also identified (Supplemental Table 1)(5). To further confirm the results of the screen, we generated deletion mutants in two genes encoding proteins of unknown function, *FTN\_0109* and *FTN\_1254*. These deletion mutants demonstrated a significant decrease in polymyxin resistance compared to wild-type, providing additional support for screen's validity (Supplemental Figure 3).

In addition to a number of genes known to be involved in the biogenesis or modification of envelope structures, and numerous genes encoding hypothetical proteins, the screen also implicated numerous potential metabolic pathways in mediating polymyxin resistance (Supplemental Table 1 and

Supplemental Figure 2). These pathways may be involved in creating necessary precursors for envelope structures, and/or increasing metabolic output, allowing sufficient energy to resist and repair damage induced by polymyxin. In either case, the results suggest an important interplay between the metabolic status of the bacterial cell and its ability to resist the action of polymyxin. It is important to note that this screen does not differentiate between mutant strains which failed to grow in the presence of polymyxin, mutant strains which can replicate in polymyxin but subsequently are killed, and those mutant strains which are actively killed more effectively by polymyxin. However, this broad screen of 229 genes already implicated in *Francisella* virulence allows the foundation for future studies to determine their precise contribution to polymyxin resistance and virulence.

## **Supplemental Methods**

### **Screen for polymyxin resistance determinants**

Four hundred and seventy transposon mutants, representing 229 genes were obtained from the *Francisella* two-allele transposon mutant library (1, 6). Each transposon mutant was grown overnight in a well of a 96 well plate containing cation-adjusted Mueller Hinton broth (MH/C-A) with 0.2% L-cysteine (BD Biosciences). Subsequently, each mutant was diluted to an OD<sub>600</sub> of 0.03 in MH/C-A containing 100µg/mL of polymyxin B (USB Corporation, Cleveland, OH). Following overnight growth at 37°C with aeration, the OD<sub>600</sub> was measured and used to calculate the percent growth compared to wild-type bacteria. Strains that grew to an OD<sub>600</sub> of less than 75% than that of wild-type were deemed to have increased sensitivity.

### **Bacterial growth kinetics.**

The indicated strains were grown overnight and subsequently diluted to an OD<sub>600</sub> of 0.03 in TSB with 0.2% L-cysteine or Chamberlain's Defined Media (CDM). Subcultures were placed at 37°C with aeration in a Biotek Synergy Mx plate reader and OD<sub>600</sub> was measured each hour for 15 hours.

### **Lipid A isolation and analysis.**

Total lipid A was isolated from the indicated strains as described previously (2). Lipid A was analyzed by LC/MS as described previously (2). Briefly, LC/MS of lipids was performed using a Shimadzu LC system coupled to a QSTAR XL quadrupole time-of-flight tandem mass spectrometer.

### **Surface charge analysis by zeta potential**

Zeta electrokinetic potentials of the indicated strains were calculated as described previously (2). Briefly, bacteria were subcultured and grown to OD<sub>600</sub> = 1.0, and subsequently washed and resuspended at a 5× concentration in 20 mM potassium chloride. Twenty microlitres of the concentrated bacteria were added to 3.2 ml of 20 mM potassium chloride in the zeta potential electrokinetic cuvette from Brookhaven

Instruments Corporation (BIC, Holtsville, NY). The bacterial cell sizes and zeta electrokinetic potentials were measured using the 90Plus size and zeta potential analyser (BIC). Data were analysed using BIC Zeta Potential Analyser Software Version 5.20, which corrects for bacterial cell size.

### **Antimicrobial resistance.**

The indicated strains were grown overnight and subsequently diluted to an OD<sub>600</sub> of 0.03 in MH/C-A with 0.2% L-cysteine containing the specified doses of Triton X (Fisher Scientific, Pittsburgh, PA), hydrogen peroxide (Fisher Scientific, Pittsburgh, PA), kanamycin (Teknova, Hollister, CA), and streptomycin (Teknova). Following overnight growth at 37°C with aeration, OD<sub>600</sub> was measured and used to calculate the percent growth compared to the growth of the strain in media alone.

### **Intracellular survival.**

Murine bone marrow-derived macrophages were infected as described in the Experimental Procedures with the indicated bacterial strains. At 4 hours post infection, macrophages were lysed with 1% saponin. Lysates were serially diluted in PBS and plated onto TSA containing 0.1% cysteine to enumerate colony forming units.

### **Campylobacter manipulations and experiments**

The GB11 (wild-type) and its cognate  $\Delta cas9$  deletion mutant have been described previously (7). Strains were routinely grown on Columbia blood agar plates containing 7% sheep blood (Becton Dickinson, Breda, The Netherlands), supplemented with vancomycin (Sigma-Aldrich, Zwijndrecht, The Netherlands) and chloramphenicol (Sigma-Aldrich) under micro-aerophilic conditions at 37°C using anaerobic jars and an Anoxomat (Mart Microbiology B.V., Drachten, The Netherlands). To measure bacterial permeability, plate-grown bacteria were recovered, washed in PBS, and diluted to a concentration of  $7.5 \times 10^7$  cfu/mL in PBS containing 30 µg/mL ethidium bromide (Sigma-Aldrich). Fluorescence was measured immediately in a Fluostar Optima plate reader (BMG Labtech) using an excitation of 250nm

and an emission of 605nm. Erythromycin susceptibility was determined using an Epsilometer-test (bioMérieux, Zaltbommel, The Netherlands). Bacteria were diluted to a 1 MacFarland suspension, swabbed onto Columbia blood agar plates, and an E-test deposited. Plates were incubated overnight, as described above, and at 24 hours the MIC was determined.

## Supplemental Figure Legends

### Supplemental Figure 1. Model of the Cas9/dual RNA complex mediating *FTN\_1103* repression.

Cas9 associates with two small RNAs, tracrRNA and scaRNA. This complex is then targeted to the *FTN\_1103* transcript, encoding a bacterial lipoprotein (BLP), and ultimately mediates the repression of BLP production by altering the stability of its mRNA. Since BLP can be recognized by TLR2, leading to a proinflammatory innate immune response, the ability of Cas9 to act as a regulatory element against this transcript is critical for *Francisella* evasion of the innate immune response.

### Supplemental Figure 2. COG categories of genes identified as being involved in polymyxin B

**resistance.** COG categories were assigned to each locus identified within the screen as defined by the *Francisella novicida* U112 genome database through NCBI (Accession #: NC\_008601.1). Quantities of each COG category were plotted as percent of all categories identified within the screen.

### Supplemental Figure 3. *FTN\_1254* and *FTN\_0109* contribute to *F. novicida* polymyxin resistance.

Wild-type (WT), *FTN\_0544*, *FTN\_1254*, or *FTN\_0109* deletion mutants were grown overnight in TSB with or without polymyxin B (200 ug/mL). Percent growth compared to untreated cultures is plotted (n=3). \*\*,  $p \leq 0.005$ , \*\*\*,  $p \leq 0.001$ .

### Supplemental Figure 4. Growth kinetics of the *cas9* deletion mutant in the presence of polymyxin B.

Overnight cultures of wild-type (WT; circles) or the *cas9* deletion mutant (squares) were diluted to an  $OD_{600}$  of  $\sim 0.03$  into the media containing indicated doses of polymyxin B in a 96-well plate. Cultures were incubated at 37°C with aeration in a Biotek Synergy Mx plate reader and  $OD_{600}$  was measured each hour for 18 hours (n=3).

### Supplemental Figure 5. Complementation of the *cas9* deletion mutant restores polymyxin

**resistance.** Wild-type (WT), *cas9* deletion mutant, or a *cas9*:complement strain were grown overnight

with or without polymyxin B (200 ug/mL). Percent growth compared to untreated cultures is plotted (n=3). \*\*:  $p \leq 0.005$ .

**Supplemental Figure 6. Other *cas* genes are not involved in polymyxin resistance.** Wild-type (WT) or deletion mutants in the indicated *cas* genes were grown overnight with or without polymyxin B (400 ug/mL). Percent growth compared to untreated cultures is plotted (n=3). \*\*:  $p \leq 0.005$

**Supplemental Figure 7. Cas9 is not involved in modification of lipid A.** Total lipid A was analyzed by LC/MS from wild-type (WT), the *cas9* deletion mutant, or the *cas9/1103* double deletion strain.

**Supplemental Figure 8. Cas9 is not involved in alteration of cell surface charge.** Cultures of wild-type (WT), the *cas9* deletion mutant, or the *cas9/1103* double deletion strain were subjected to zeta electrokinetic potential analysis. Data presented for each strain is pooled from 3 independent cultures, with multiple technical replicates.

**Supplemental Figure 9. *FTN\_1103* regulation by tracrRNA and scaRNA is necessary for polymyxin resistance.** (A) Wild-type (WT), tracrRNA or tracrRNA/*1103* deletion mutants, or (B) WT, scaRNA or scaRNA/*1103* deletion mutants, were grown overnight in TSB containing the indicated concentrations of polymyxin B. Percent growth compared to untreated cultures is plotted (n=3). Data presented was generated during the same experiment as Figures 1a, b, utilizing the same controls, and plotted separately for clarity. \*\*:  $p \leq 0.005$ .

**Supplemental Figure 10. Cas9 regulatory axis provides resistance to Triton X.** (A) Wild-type (WT), *cas9* and *cas9/1103* deletion mutants, (B) tracrRNA and tracrRNA/*1103* deletion mutants, or (C) scaRNA and scaRNA/*1103* deletion mutants were grown overnight in TSB, in the presence or absence of the non-ionic detergent Triton X (0.0125%). Percent growth compared to untreated cultures is plotted (n=3). Data

presented was generated during the same experiment, utilizing the same controls, and plotted separately for clarity. \*;  $p \leq 0.05$ .

**Supplemental Figure 11. Cas9 regulatory axis is not required for resistance to hydrogen peroxide.**

(A) Wild-type (WT), *cas9* and *cas9/1103* deletion mutants, (B) WT, *tracrRNA* and *tracrRNA/1103* deletion mutants, or (C) WT, *scaRNA* and *scaRNA/1103* deletion mutants were grown overnight in TSB containing the indicated concentrations of hydrogen peroxide. Percent growth compared to untreated cultures is plotted (n=3). Data presented was generated during the same experiment, utilizing the same controls, and plotted separately for clarity. \* $p > 0.05$ .

**Supplemental Figure 12. Cas9 regulatory axis is required for resistance to kanamycin.** Wild-type (WT), *cas9*, *cas9/1103*, *tracrRNA*, *tracrRNA/1103*, *scaRNA*, and *scaRNA/1103* deletion mutants were grown overnight in TSB containing the indicated concentrations of kanamycin. Percent growth compared to untreated cultures is plotted (n=3). \* $p > 0.05$ , \*\*\*;  $p \leq 0.001$ .

**Supplemental Figure 13. Cas9 regulatory axis is required for resistance to streptomycin.** Wild-type (WT), *cas9*, *cas9/1103*, *tracrRNA*, *tracrRNA/1103*, *scaRNA*, and *scaRNA/1103* deletion mutants were grown overnight in TSB containing the indicated concentrations of streptomycin. Percent growth compared to untreated cultures is plotted (n=3). \* $p > 0.05$ .

**Supplemental Figure 14. *cas9* mutant does not have altered viability during growth in broth.** Prior to propidium iodide staining (Figure 1c), wild-type (WT), *cas9*, or *cas9/1103* deletion mutants were grown to mid-log phase in TSB, washed and plated to enumerate colony forming units (n=3).

**Supplemental Figure 15. Cas9 regulatory axis mutants exhibit wild-type growth kinetics in rich or synthetic media.** Wild-type (WT), *cas9*, *tracrRNA*, *scaRNA*, *cas9/1103*, *tracrRNA/1103* and



scaRNA/1103 deletion mutants were grown in (A) TSB or (B) Chamberlain's defined media (CHB) for 15 hours, and OD<sub>600</sub> was measured every hour (n=3).

**Supplemental Figure 16. *FTN\_1103* regulation by tracrRNA and scaRNA is necessary for enhanced envelope integrity.** Wild-type (WT), tracrRNA, tracrRNA/1103, scaRNA, or scaRNA/1103 deletion mutants were grown to mid-log phase, washed, and stained with ethidium bromide. Fluorescence was measured at excitation 250nm and emission 605nm (n=3). \*\*,  $p \leq 0.005$ , \*\*\*,  $p \leq 0.001$ .

**Supplemental Figure 17. *FTN\_1103* regulation by tracrRNA and scaRNA is necessary for enhanced envelope integrity during intracellular infection.** (A) Bone marrow-derived macrophages were infected with wild-type (WT), tracrRNA, tracrRNA/1103, scaRNA, or scaRNA/1103 deletion mutants at a multiplicity of infection (MOI) of 20:1 (bacteria per macrophage). At 4 hours post infection, macrophages were permeabilized with saponin and lysates were plated to enumerate intracellular bacterial levels (n=3). (B) Macrophages were infected as above, and at 4 hours post infection, macrophages were permeabilized with saponin and stained with anti-*Francisella* antibody (green), and propidium iodide (nucleic acids; red). Co-localization was quantified as no less than 50% PI overlap with *Francisella*, and 1,000 bacteria were counted for each strain. (C) Representative fluorescence micrographs of WT, tracrRNA, tracrRNA/1103, scaRNA, or scaRNA/1103 deletion mutants. DAPI (DNA; blue), anti-*Francisella* antibody (green), and propidium iodide (nucleic acids; red). Arrows indicate representative PI and anti-*Francisella* co-localization. \*\*,  $p \leq 0.005$ , \*\*\*,  $p \leq 0.001$ .

**Supplemental Figure 18. *FTN\_1103* regulation by tracrRNA and scaRNA promotes evasion of the inflammasome.** Wild-type (WT), ASC<sup>-/-</sup>, and TLR2<sup>-/-</sup>, knockout macrophages were infected with WT, tracrRNA, tracrRNA/1103, scaRNA, or scaRNA/1103 deletion mutants at a multiplicity of infection (MOI) of 20:1. At 5.5 hours post infection, cells were assayed for cytotoxicity through LDH release (n=3). \*,  $p \leq 0.05$ , \*\*,  $p \leq 0.005$ , \*\*\*,  $p \leq 0.001$ .

**Supplemental Figure 19. Other CRISPR/Cas components are not required for evasion of the inflammasome.** Wild-type bone marrow-derived macrophages were infected with wild-type (WT), *cas9*, *cas1*, *cas2*, *cas4*, *tracrRNA*, *crRNA*, or *scaRNA* deletion mutants at a multiplicity of infection (MOI) of 20:1. At 5.5 hours post infection, cells were assayed for cytotoxicity through LDH release (n=3). \*\*\*,  $p \leq 0.001$ .

**Supplemental Figure 20. Sublethal treatment with polymyxin induces increased permeability without loss of bacterial viability.** Wild-type bacteria were treated with 40 $\mu$ g/mL polymyxin B for 30min, at 37°C with aeration. (A) Treated and untreated cultures were plated and colony forming units enumerated. (B) Treated and untreated cultures were grown to mid-log phase, washed, and stained with ethidium bromide and fluorescence measured (n=3). \*\*\*,  $p \leq 0.001$ .

**Supplemental Figure 21. Virulence of the *cas9* mutant is not restored in *ASC*<sup>-/-</sup> or *TLR2*<sup>-/-</sup> mice.** (A) Wild-type (WT), *ASC*<sup>-/-</sup>, *TLR2*<sup>-/-</sup>, or *ASC/TLR2*-deficient mice were inoculated subcutaneously with 10<sup>5</sup> cfu of the *cas9* deletion strain. Forty-eight hours post infection, spleens were harvested and plated to quantify bacterial levels (n=5). (B, C) Groups of 5 (B) WT or *TLR2*<sup>-/-</sup> and (C) WT or *ASC*<sup>-/-</sup> mice were inoculated subcutaneously with 10<sup>8</sup> cfu of WT or *cas9* deletion strains. Mice were monitored for survival over 20 days. \*\*,  $p \leq 0.005$ .

**Supplemental Figure 22. ASC and TLR2 control inflammasome activation and cytokine response against *cas9* deletion mutants.** (A) Wild-type (WT), *TLR2*<sup>-/-</sup>, *ASC*<sup>-/-</sup> and *ASC/TLR2*-deficient bone marrow-derived macrophages were infected with wild-type (WT), *cas9*, or *cas9/1103* deletion mutants at a multiplicity of infection (MOI) of 20:1 (bacteria per macrophage). At 5.5 hours post infection, cells were assayed for cytotoxicity using the LDH release assay (n=3). (B) Identical infections as above were

performed and at 4 hours post infection, infection supernatants collected, and ELISA performed for the pro-inflammatory cytokine IL-6 (n=3). \*;  $p \leq 0.05$ , \*\*;  $p \leq 0.005$ .

**Supplemental Figure 23. *Campylobacter jejuni* Cas9 controls envelope permeability and erythromycin resistance.** (A) Cultures of wild-type GB11 (WT) and the *cas9* deletion mutant were washed, stained with ethidium bromide, and fluorescence measured (n=4). (B) MIC breakpoints as determined by erythromycin E-test for WT or the *cas9* deletion mutant. \*\*\*;  $p \leq 0.001$ .

## Supplemental References

1. Llewellyn AC, Jones CL, Napier BA, Bina JE, & Weiss DS (2011) Macrophage replication screen identifies a novel Francisella hydroperoxide resistance protein involved in virulence. (Translated from eng) *PLoS One* 6(9):e24201 (in eng).
2. Llewellyn AC, *et al.* (2012) NaxD is a deacetylase required for lipid A modification and Francisella pathogenesis. (Translated from eng) *Mol Microbiol* 86(3):611-627 (in eng).
3. Kanistanon D, *et al.* (2008) A Francisella mutant in lipid A carbohydrate modification elicits protective immunity. (Translated from eng) *PLoS Pathog* 4(2):e24 (in eng).
4. Wang X, Karbarz MJ, McGrath SC, Cotter RJ, & Raetz CR (2004) MsbA transporter-dependent lipid A 1-dephosphorylation on the periplasmic surface of the inner membrane: topography of Francisella novicida LpxE expressed in Escherichia coli. (Translated from eng) *J Biol Chem* 279(47):49470-49478 (in eng).
5. Raynaud C, *et al.* (2007) Role of the wbt locus of Francisella tularensis in lipopolysaccharide O-antigen biogenesis and pathogenicity. (Translated from eng) *Infect Immun* 75(1):536-541 (in eng).
6. Gallagher LA, *et al.* (2007) A comprehensive transposon mutant library of Francisella novicida, a bioweapon surrogate. (Translated from eng) *Proc Natl Acad Sci U S A* 104(3):1009-1014 (in eng).
7. Louwen R, *et al.* (2013) A novel link between Campylobacter jejuni bacteriophage defence, virulence and Guillain-Barre syndrome. (Translated from Eng) *Eur J Clin Microbiol Infect Dis* 32(2):207-226 (in Eng).

Supplemental Figure 1.

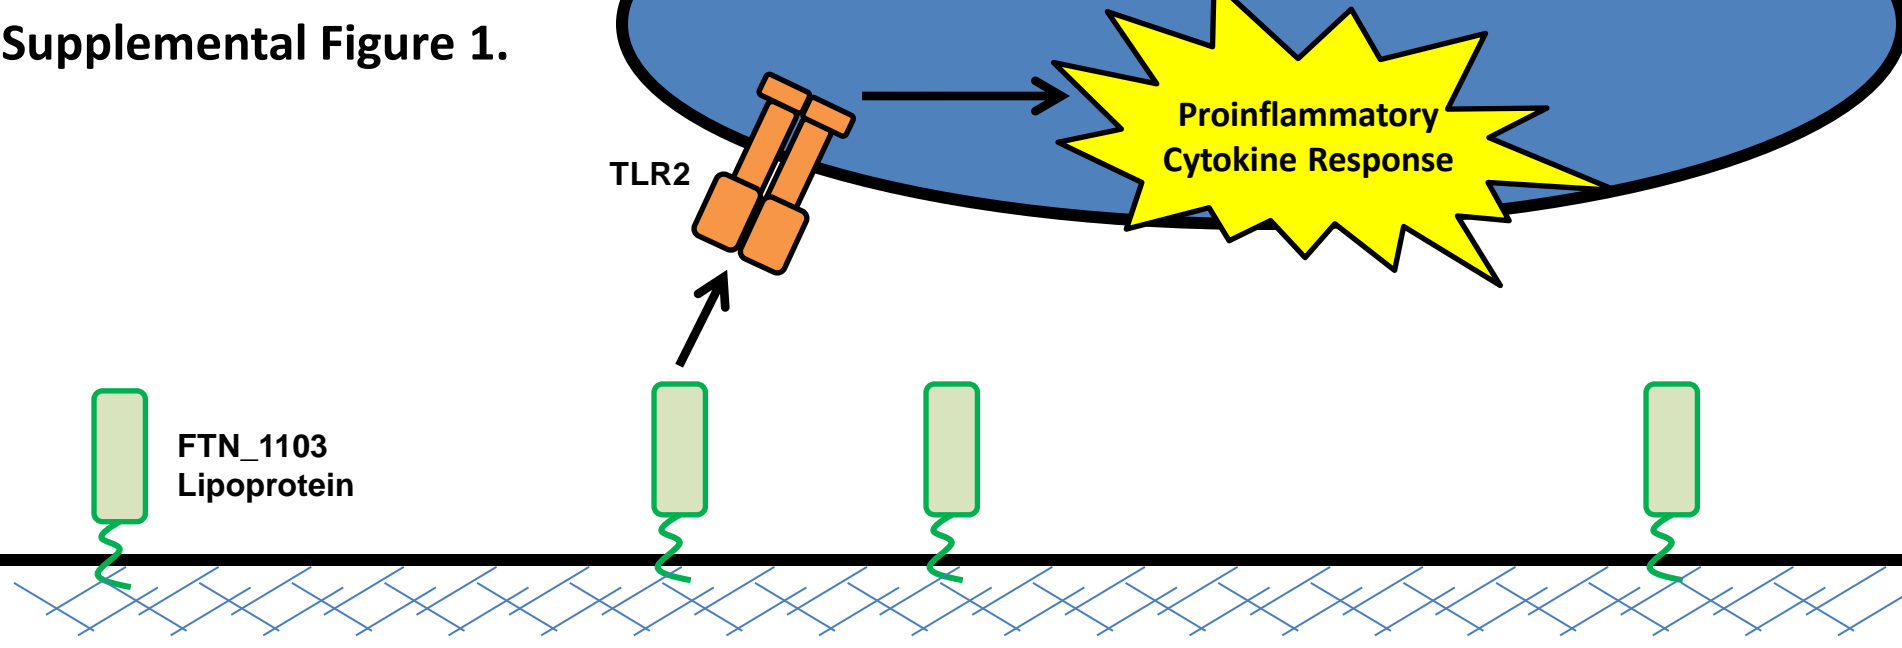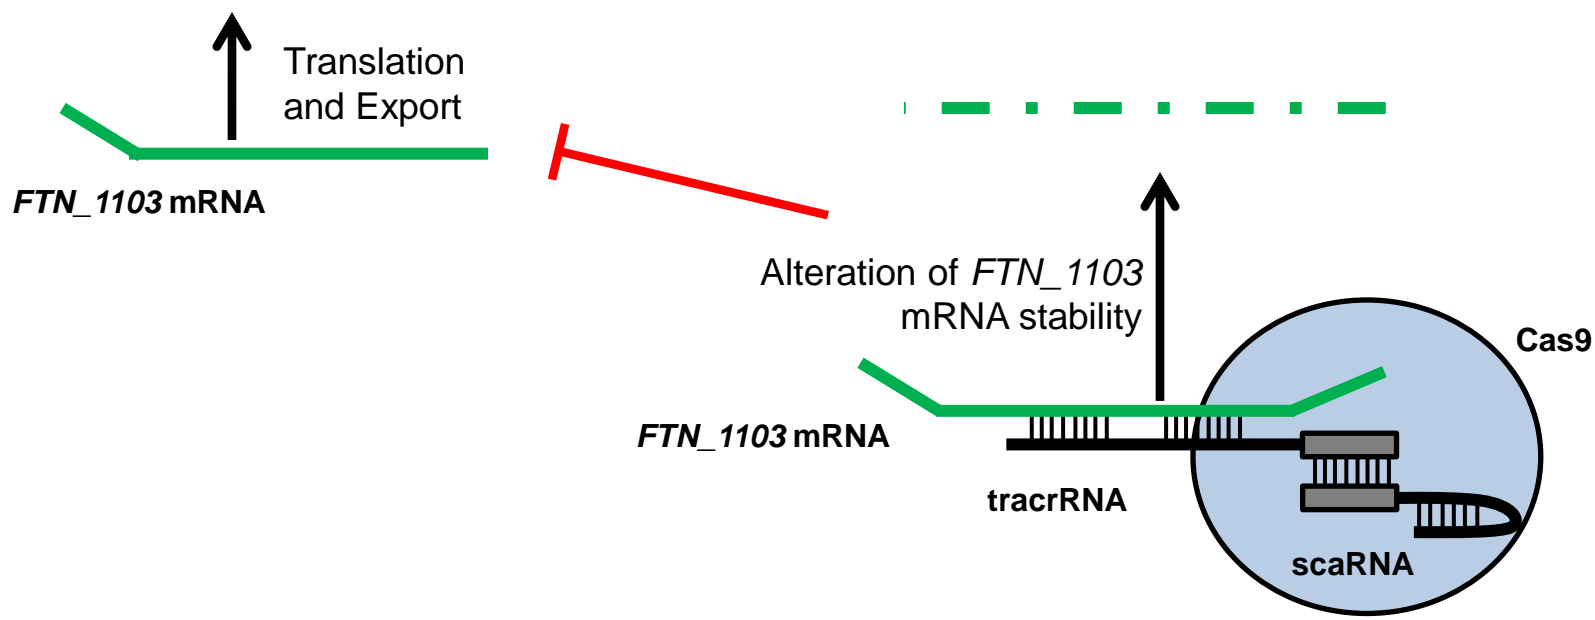

**Supplemental Figure 2.**

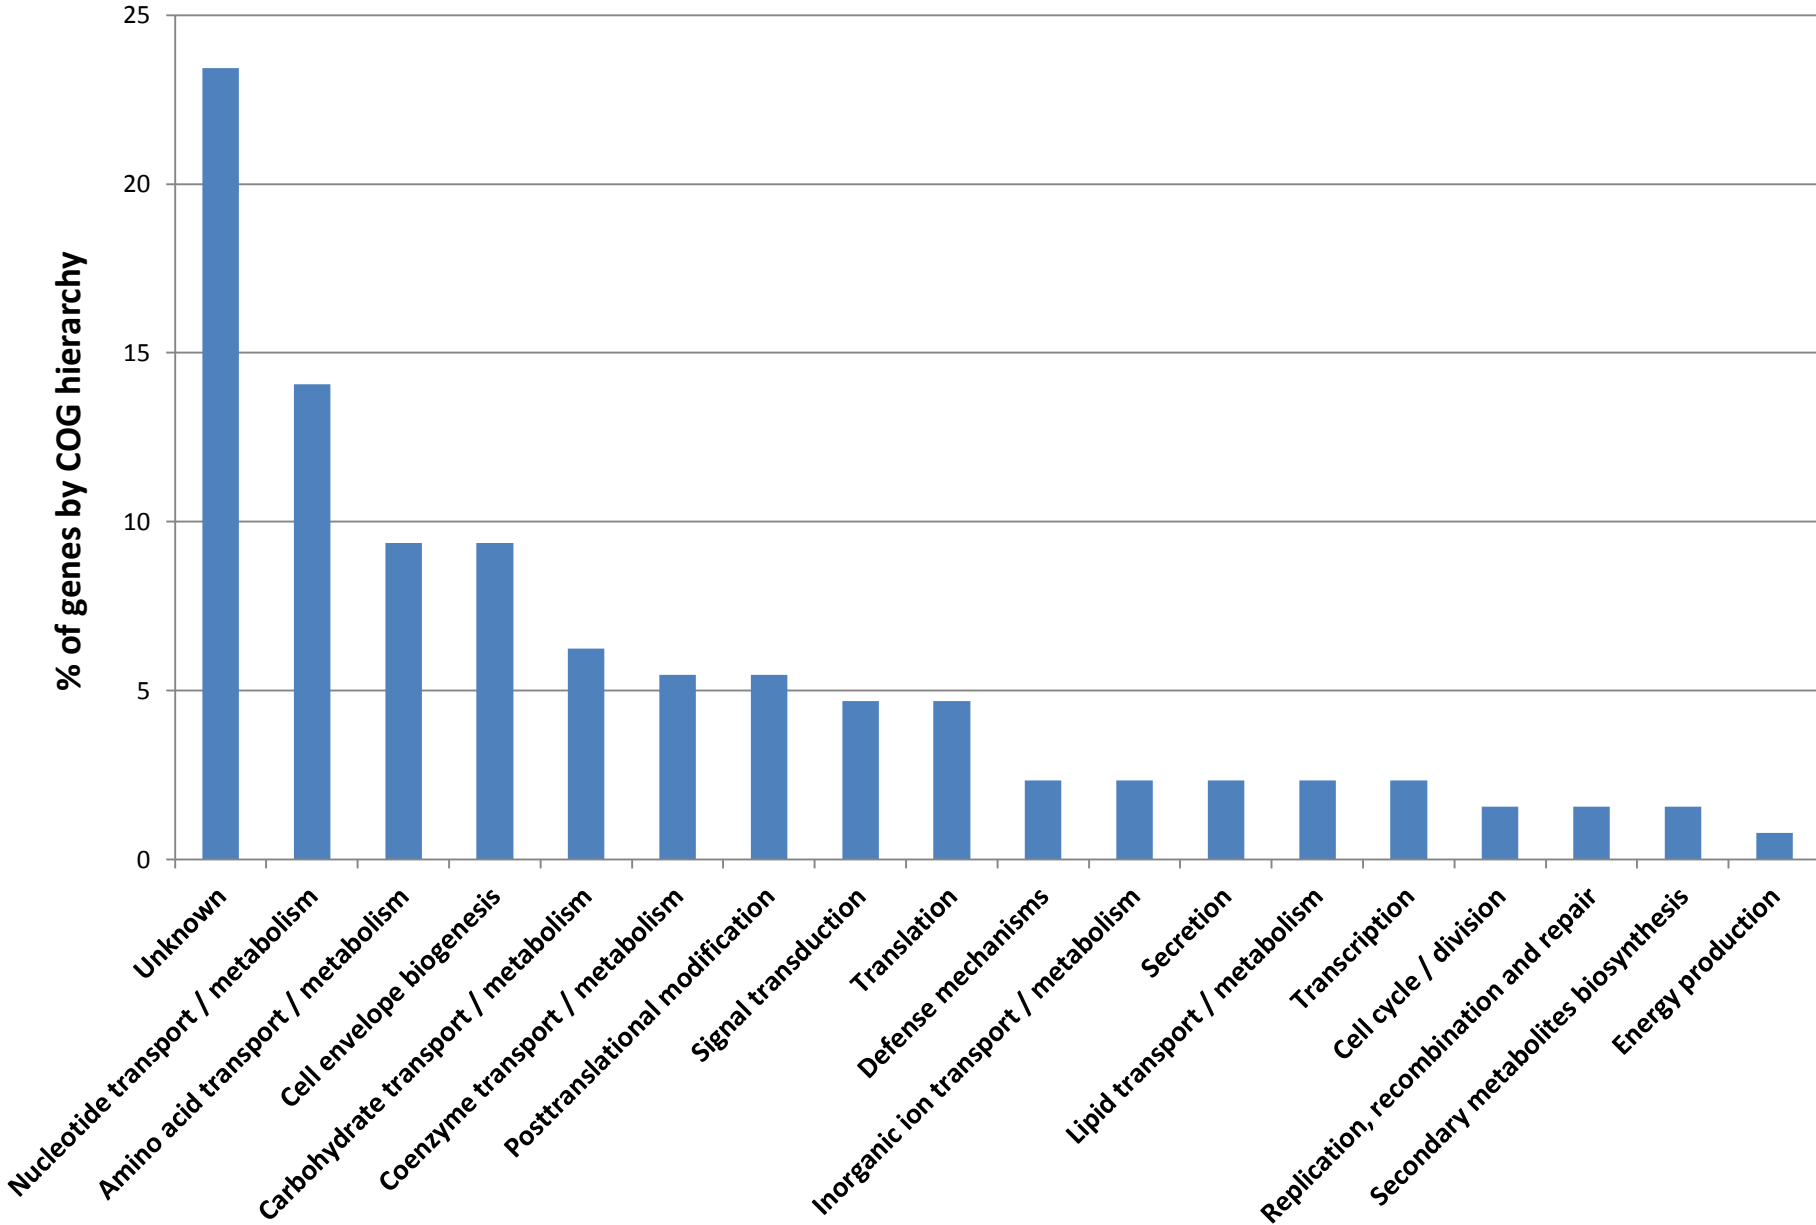

Supplemental Figure 3.

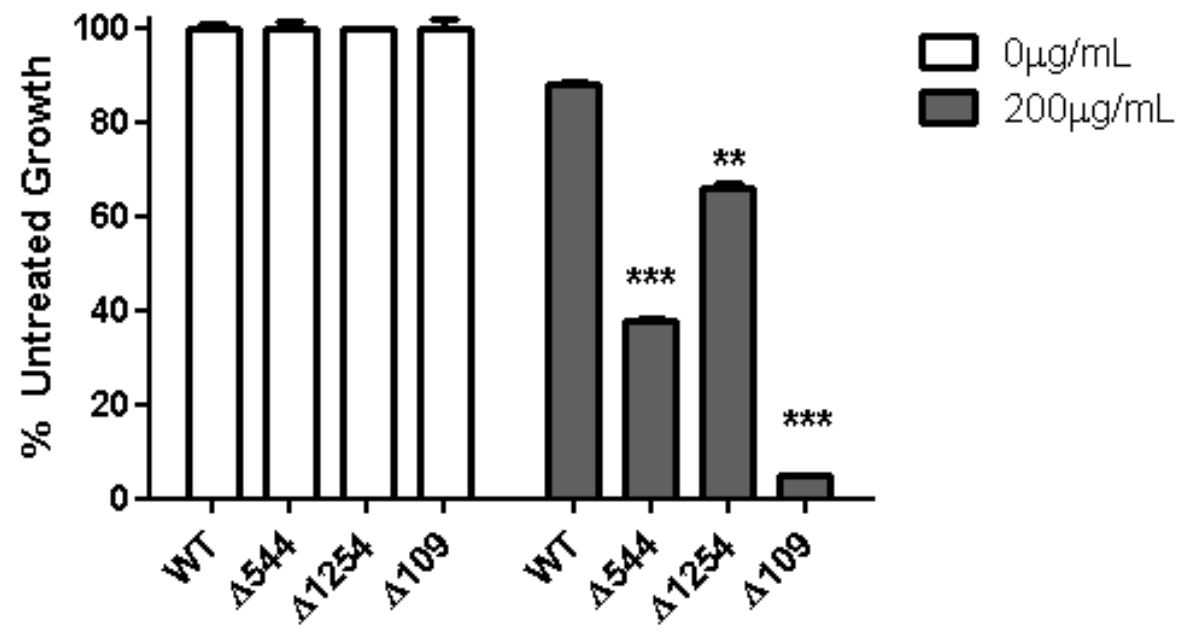

Supplemental Figure 4.

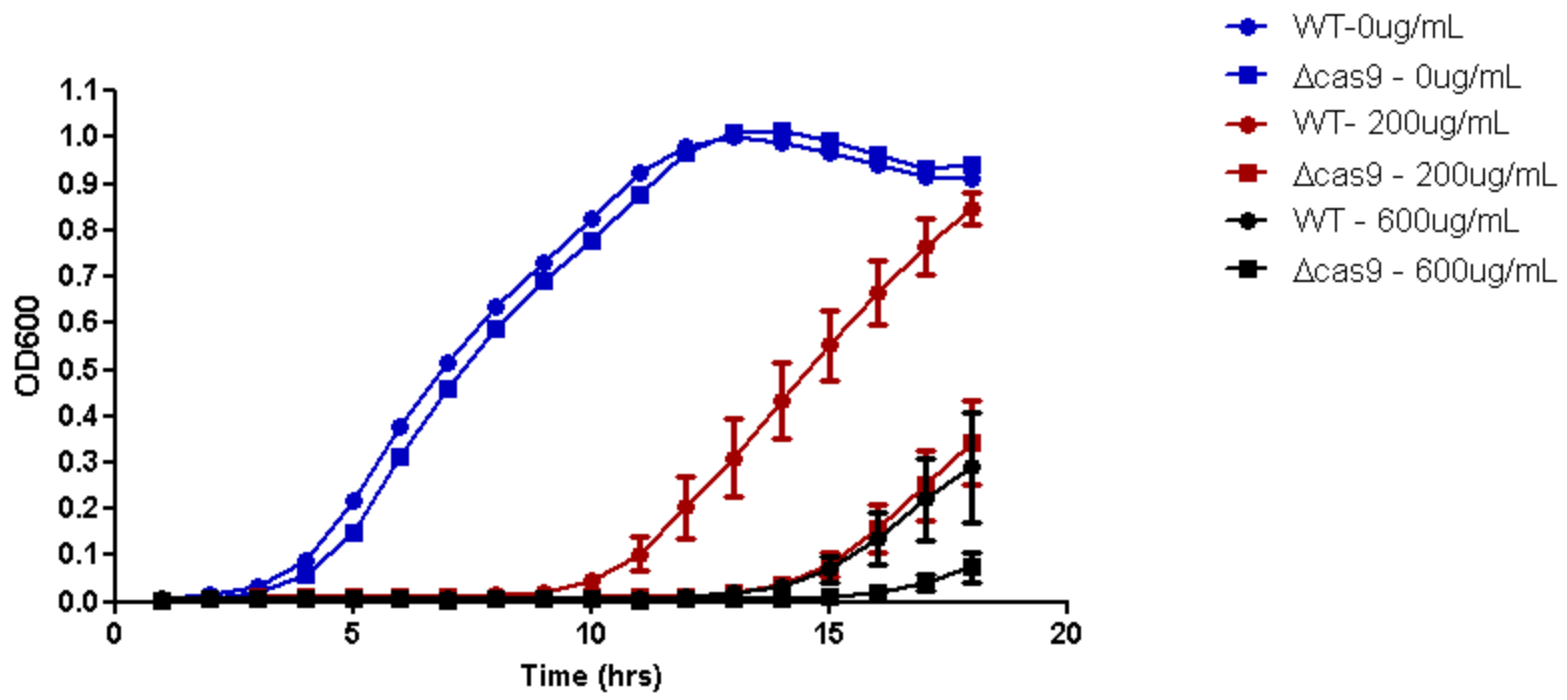



# Supplemental Figure 5.

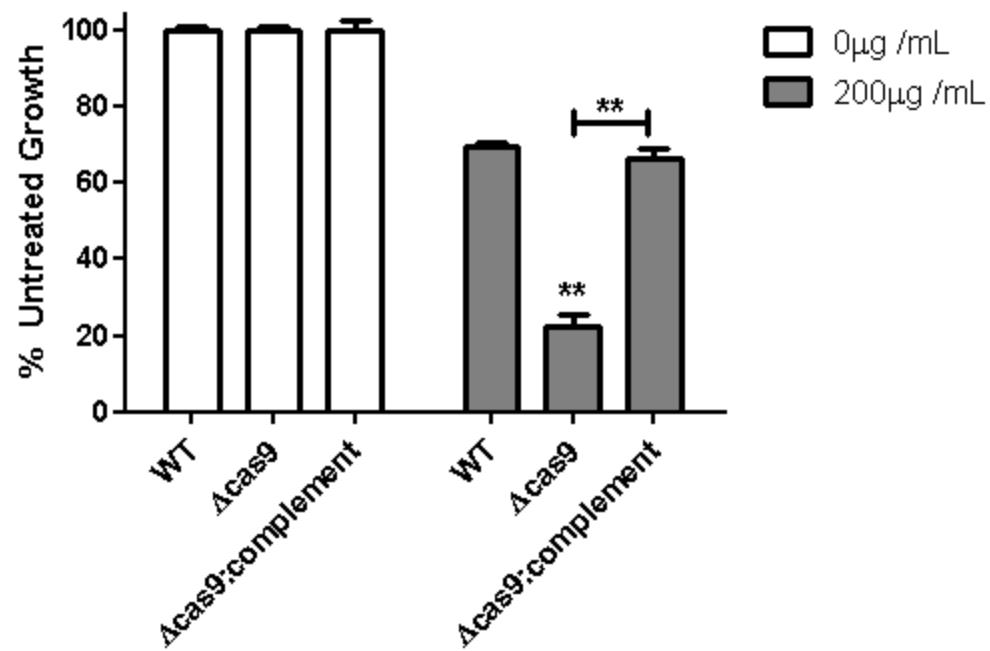

Supplemental Figure 6.

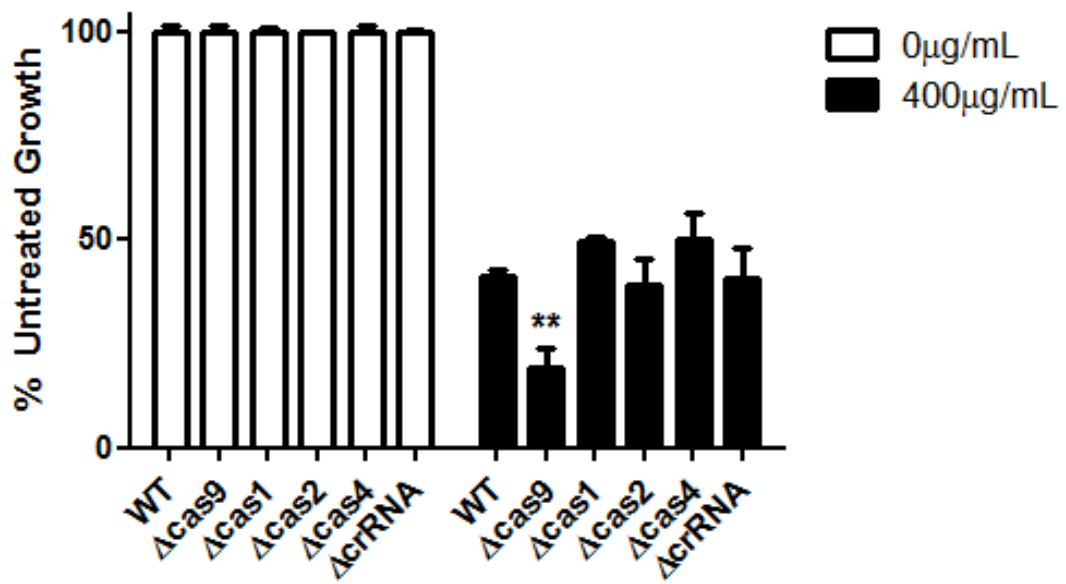

# Supplemental Figure 7.

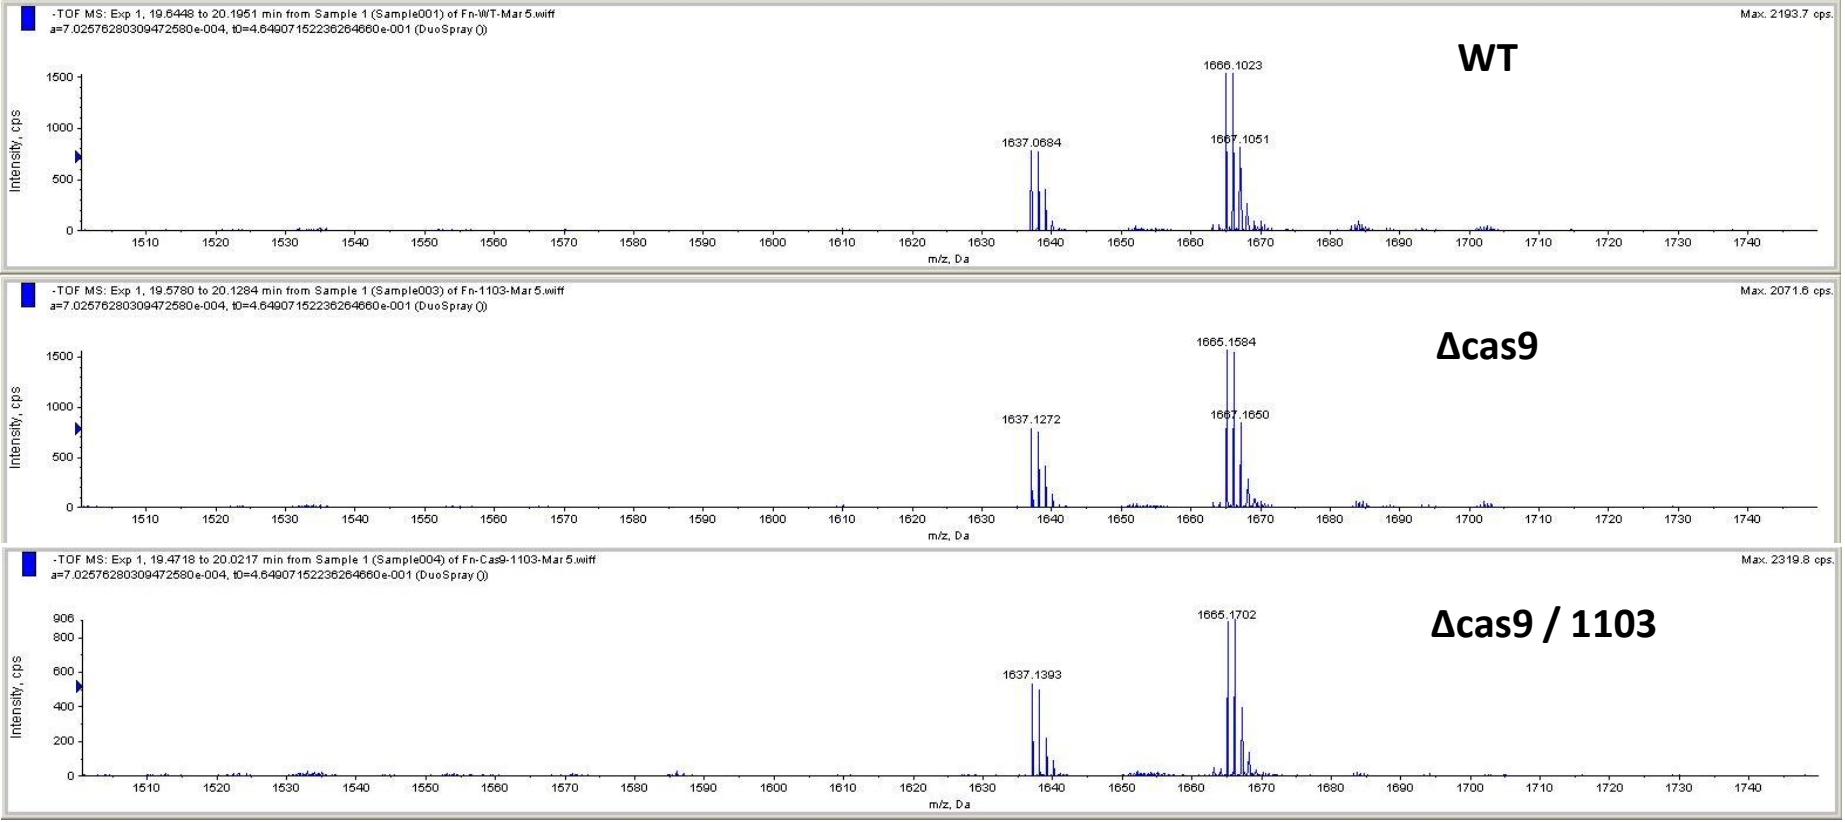

Supplemental Figure 8.

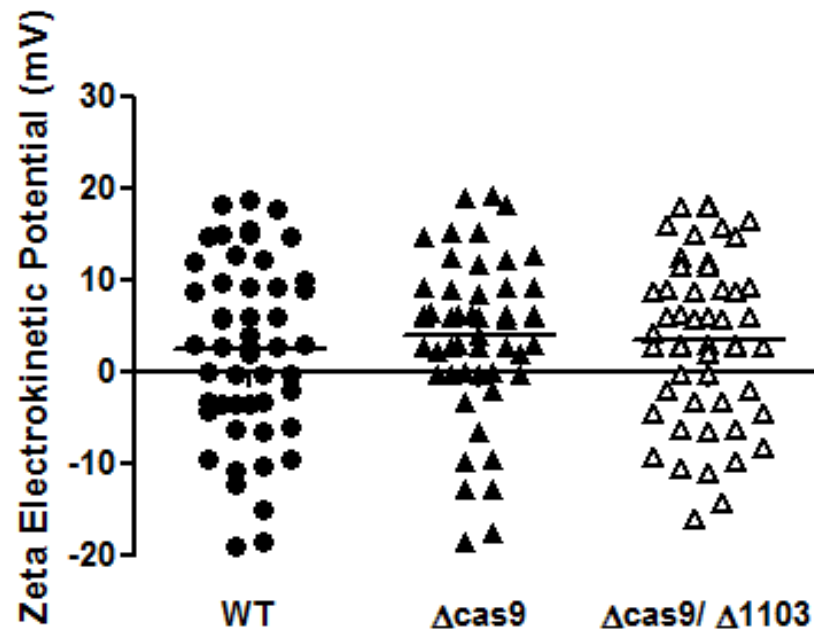

# Supplemental Figure 9.

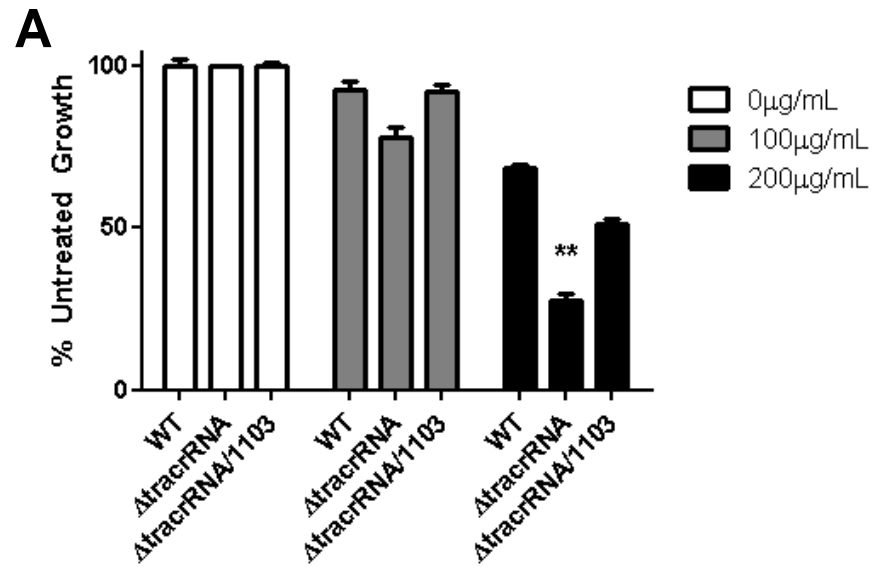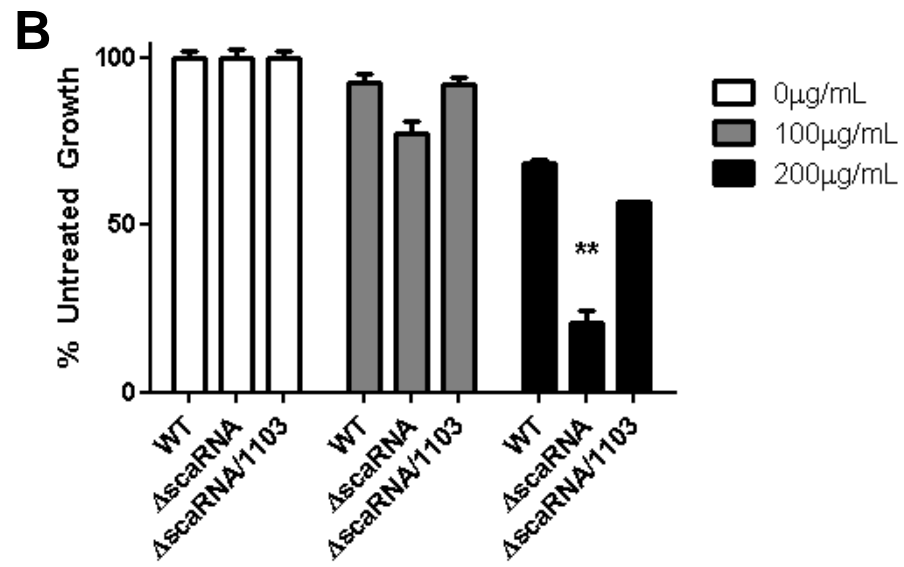

# Supplemental Figure 10.

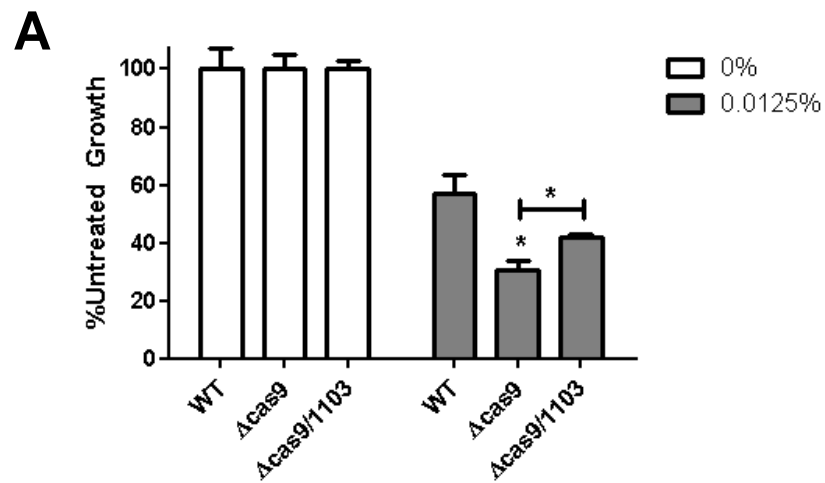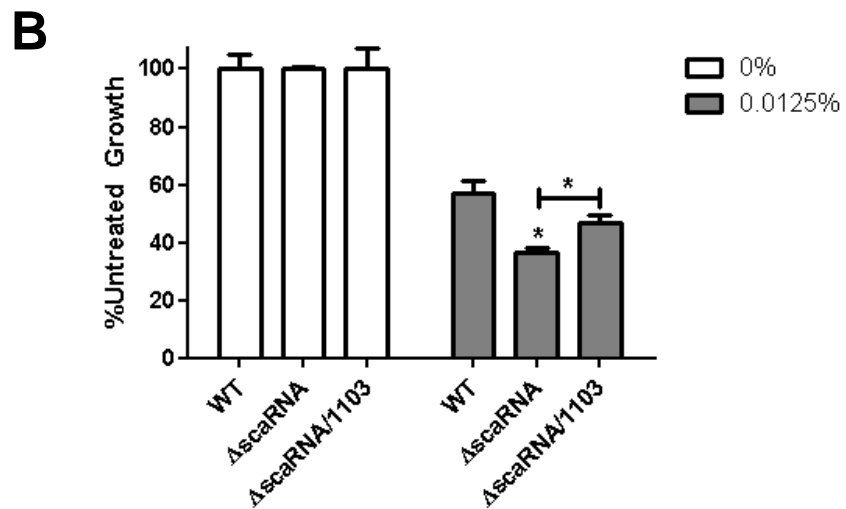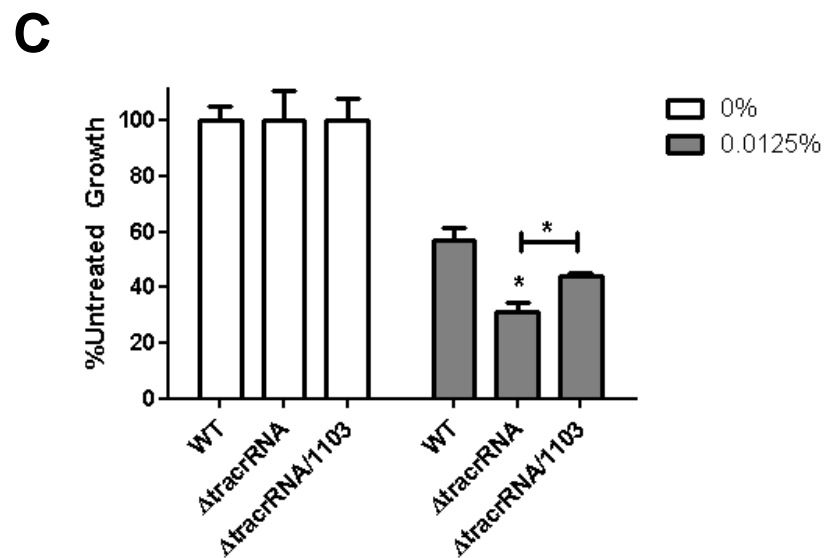

# Supplemental Figure 11.

## A

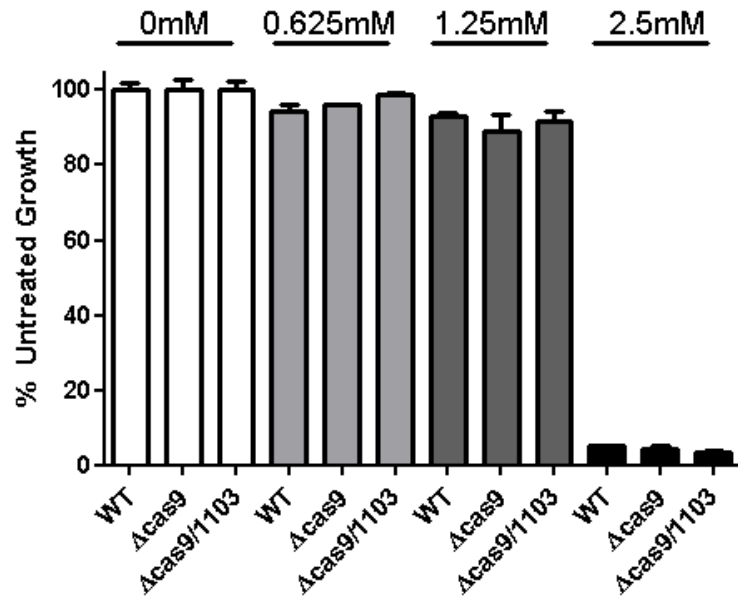

## B

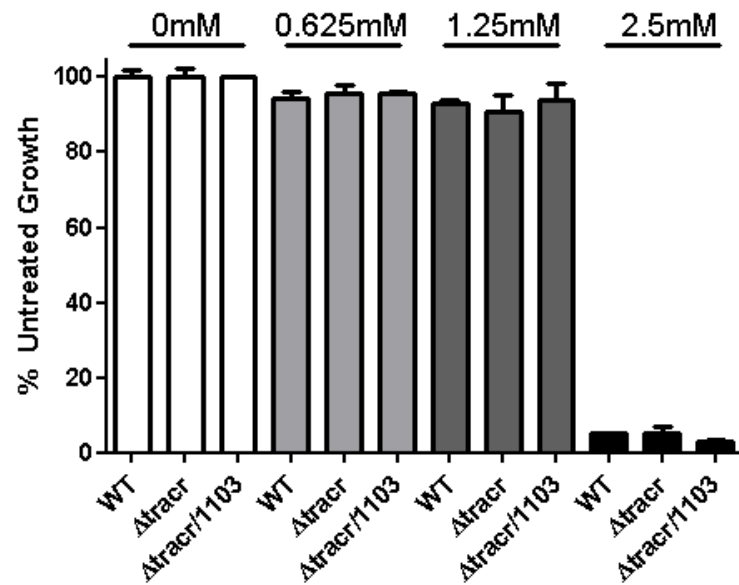

## C

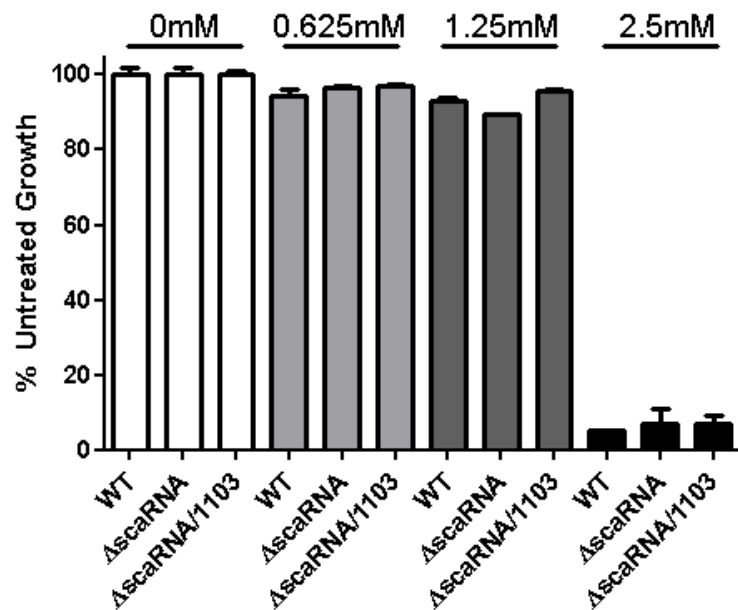

Supplemental Figure 12.

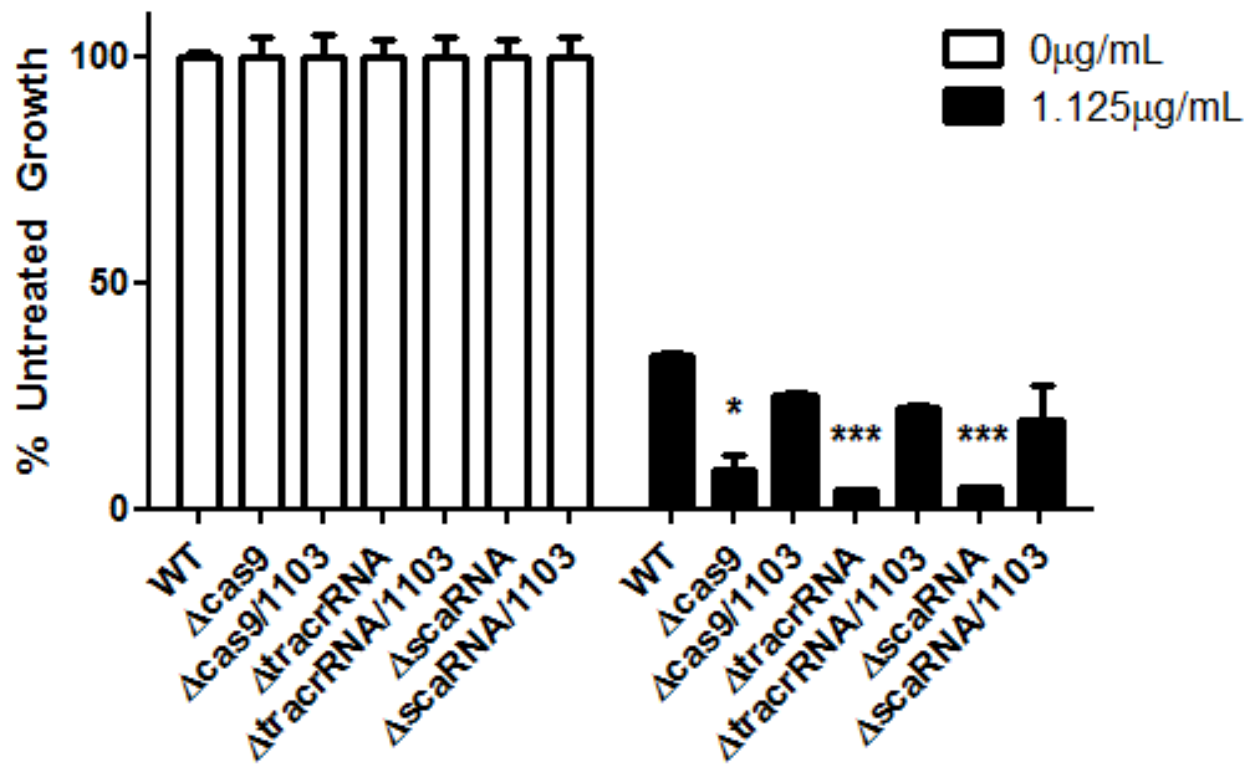



Supplemental Figure 13.

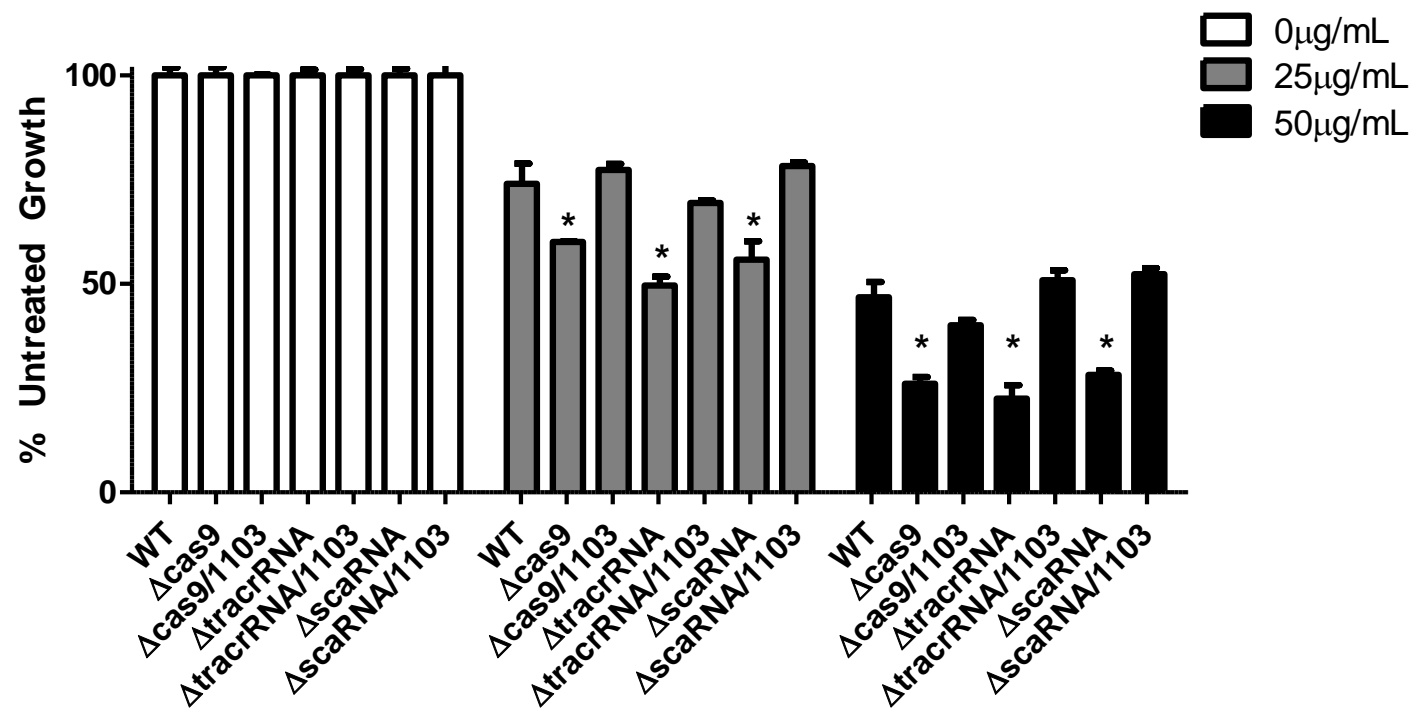

# Supplemental Figure 14.

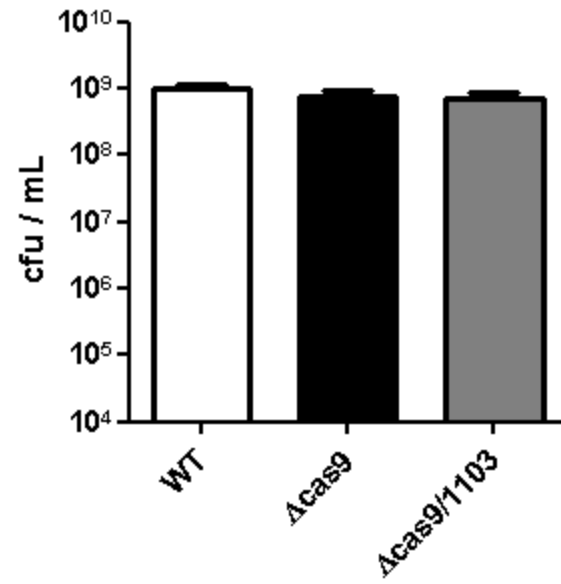

# Supplemental Figure 15.

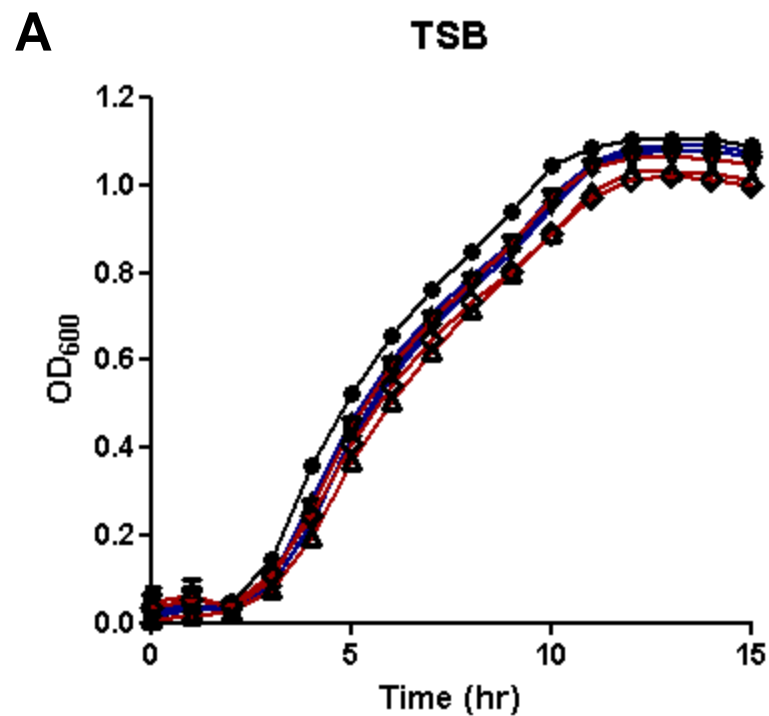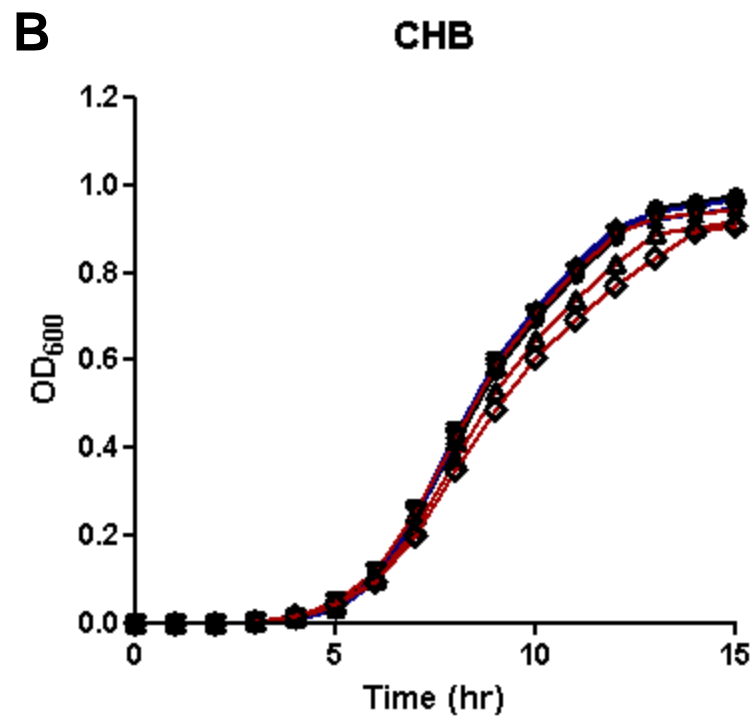

- WT
- ▲  $\Delta$ cas9
- ▼  $\Delta$ tracrRNA
- ◆  $\Delta$ scaRNA
- ▲  $\Delta$ cas9/1103
- ▼  $\Delta$ tracrRNA/1103
- ◆  $\Delta$ scaRNA/1103

Supplemental Figure 16.

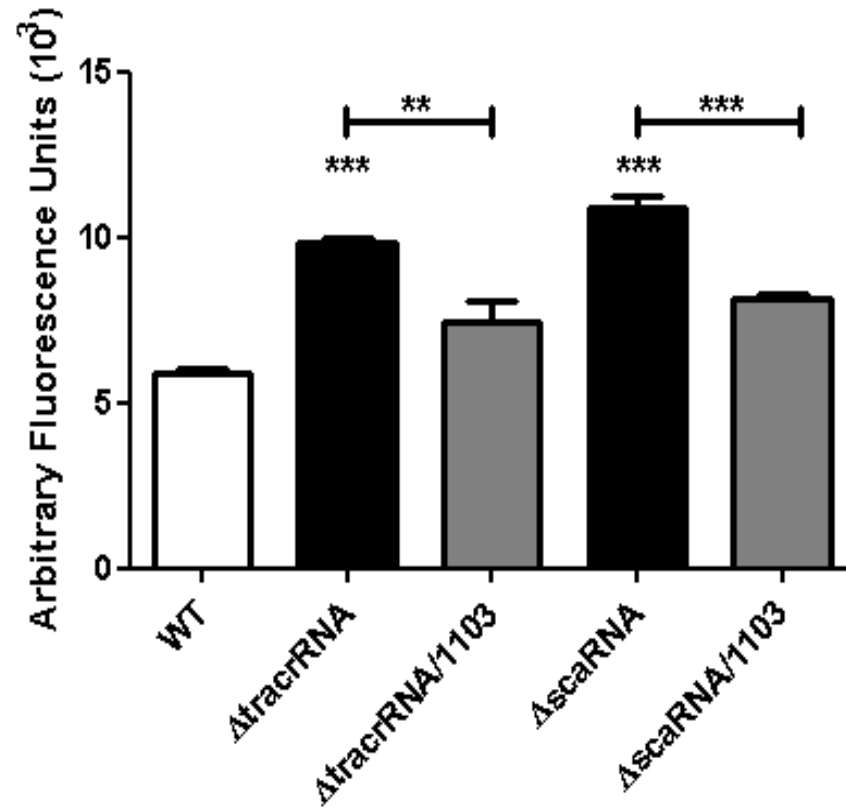

# Supplemental Figure 17.

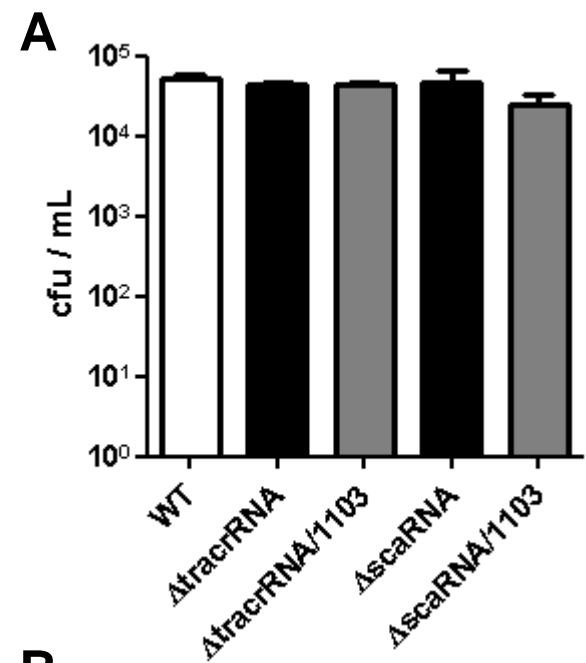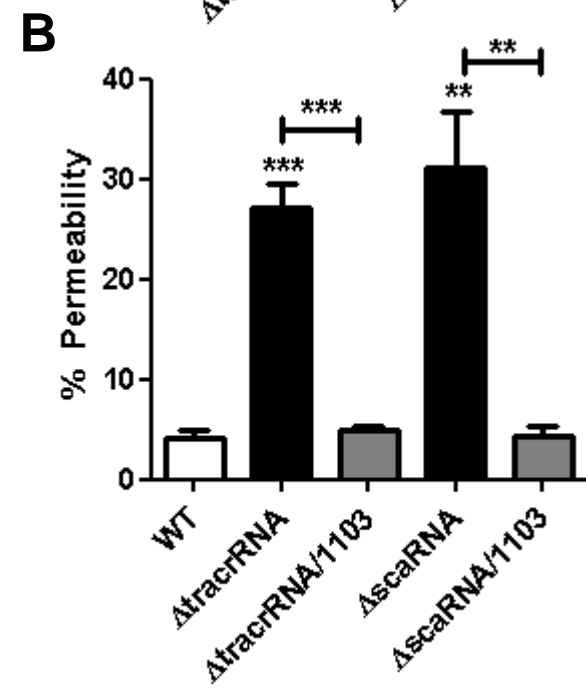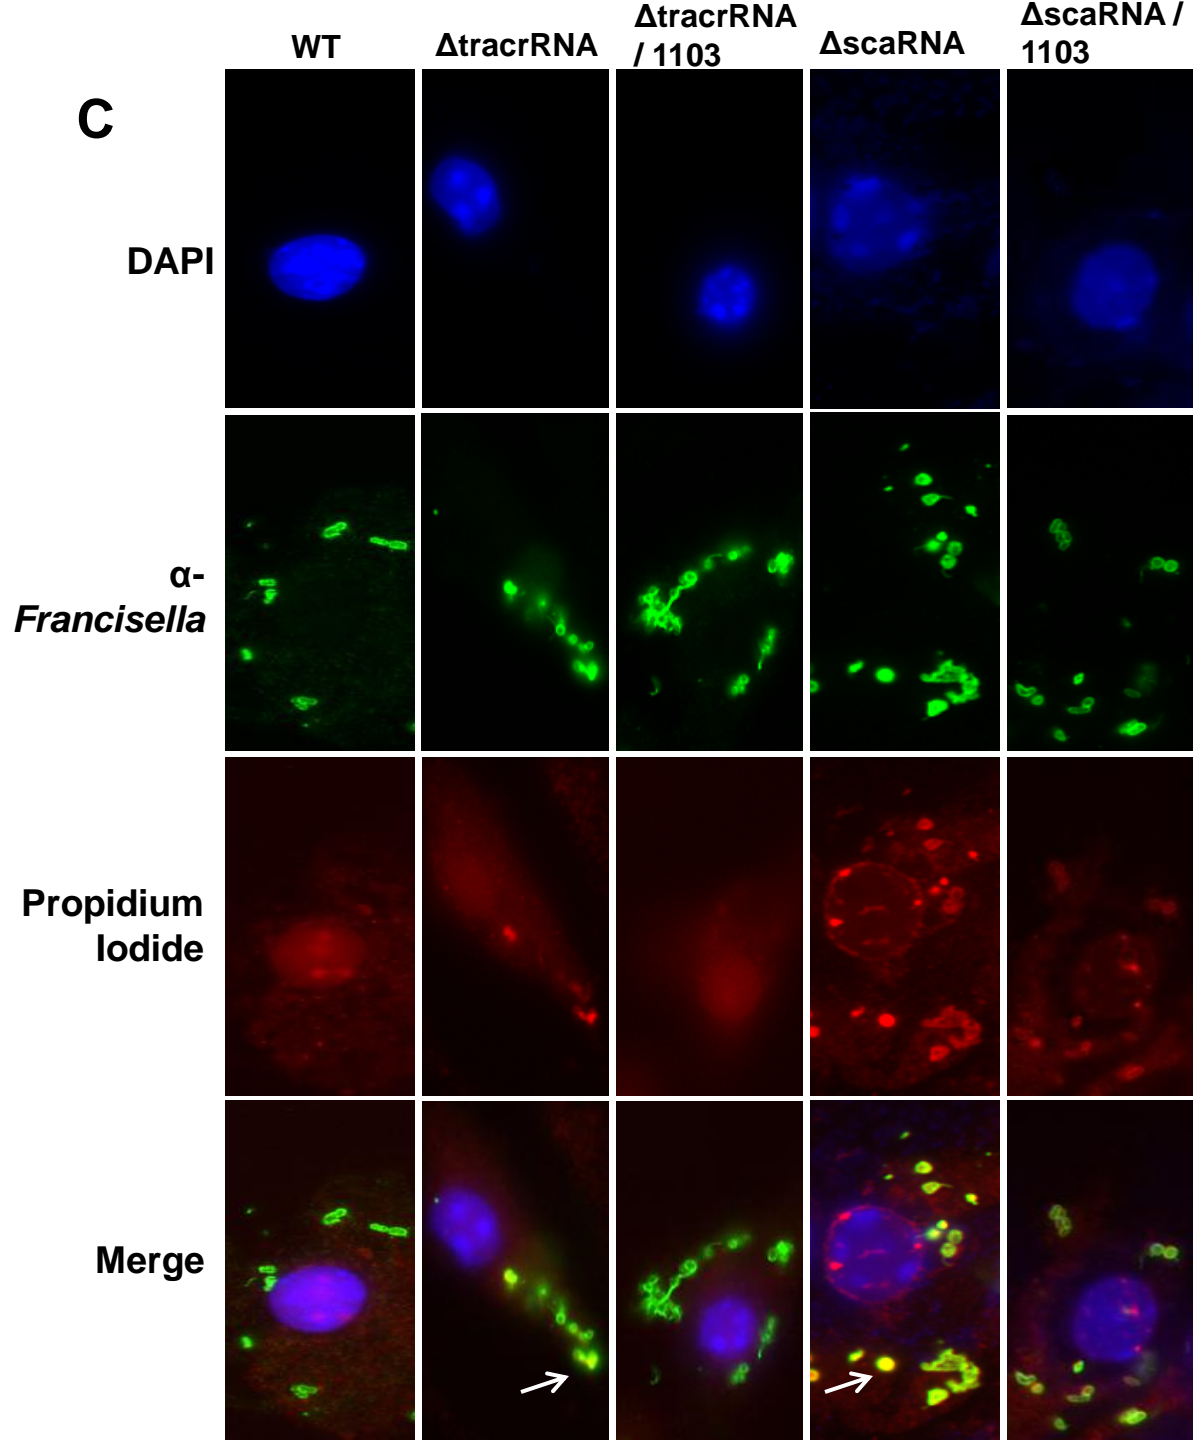

Supplemental Figure 18.

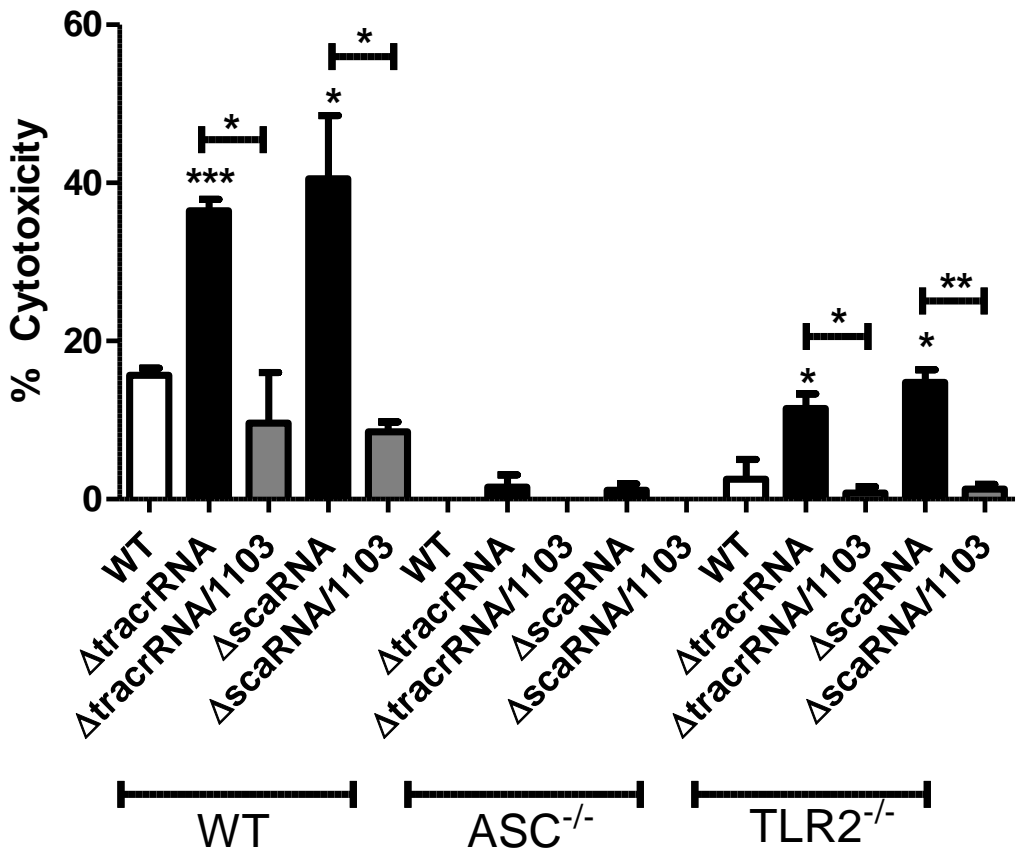

Supplemental Figure 19.

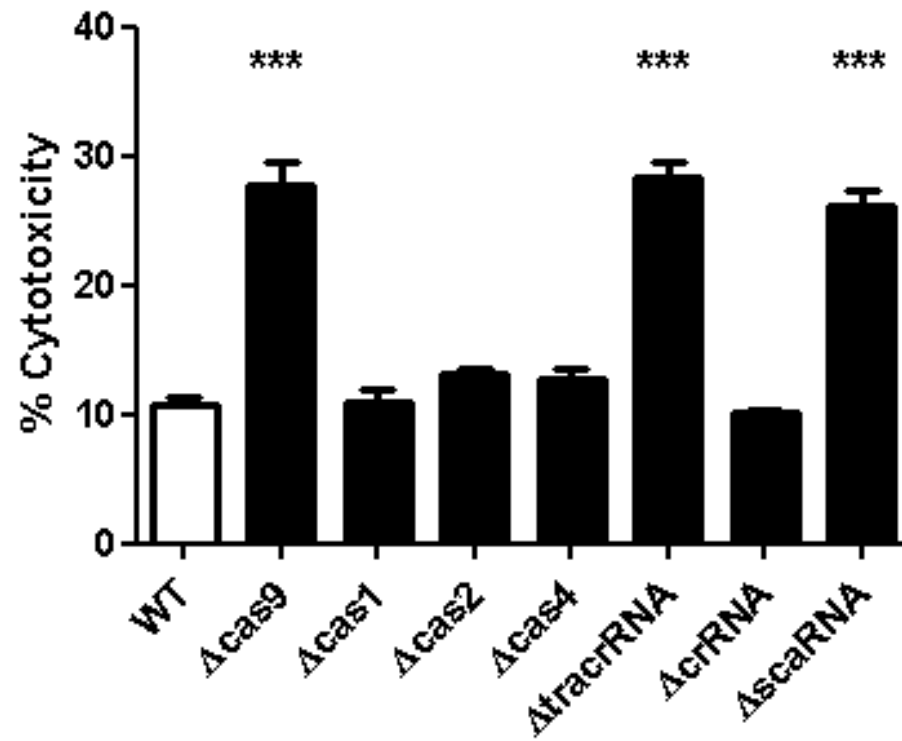

# Supplemental Figure 20.

**A**

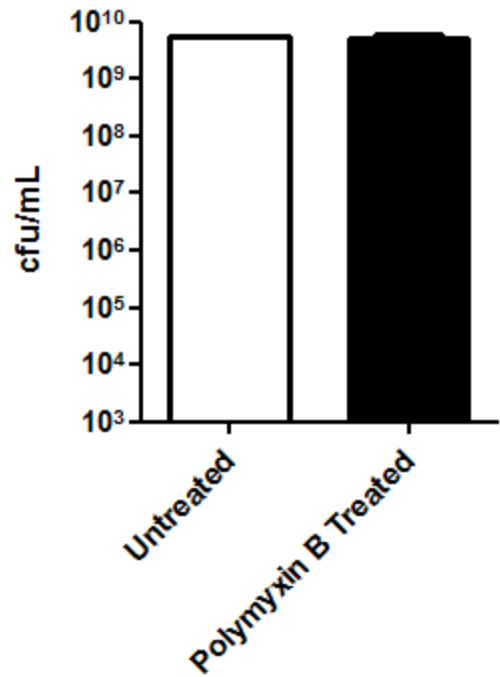

**B**

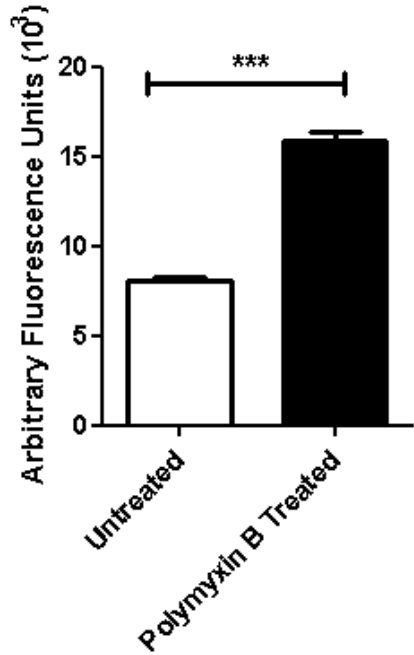



# Supplemental Figure 21.

**A**

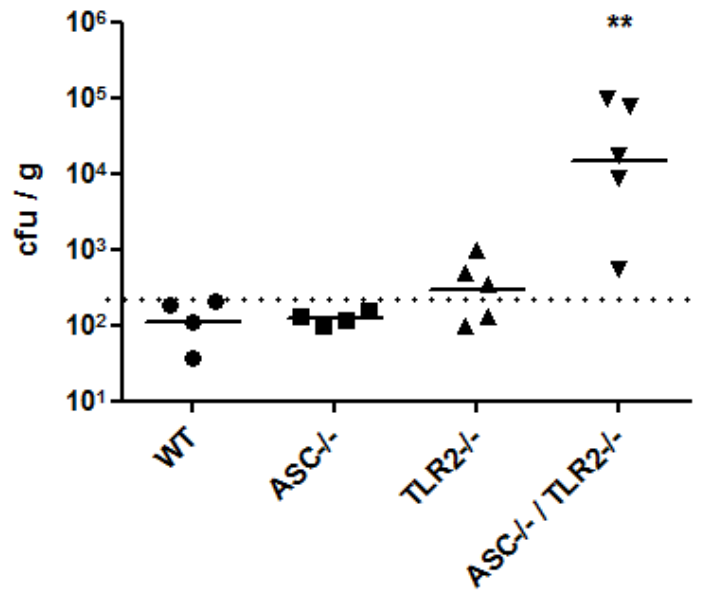

**B**

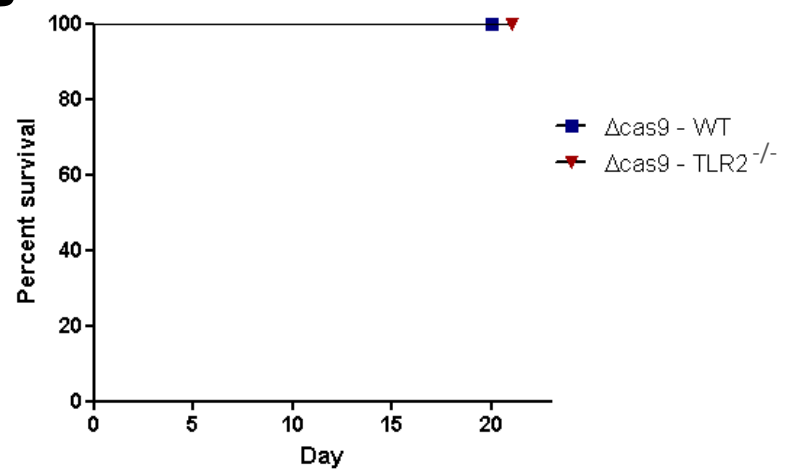

**C**

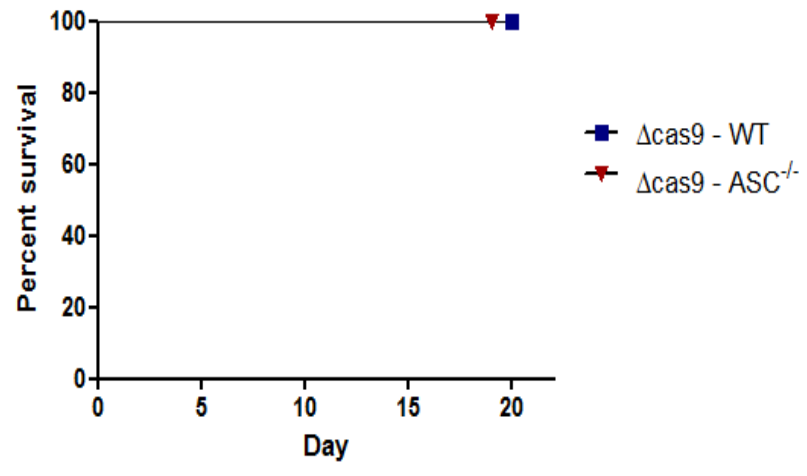

# Supplemental Figure 22.

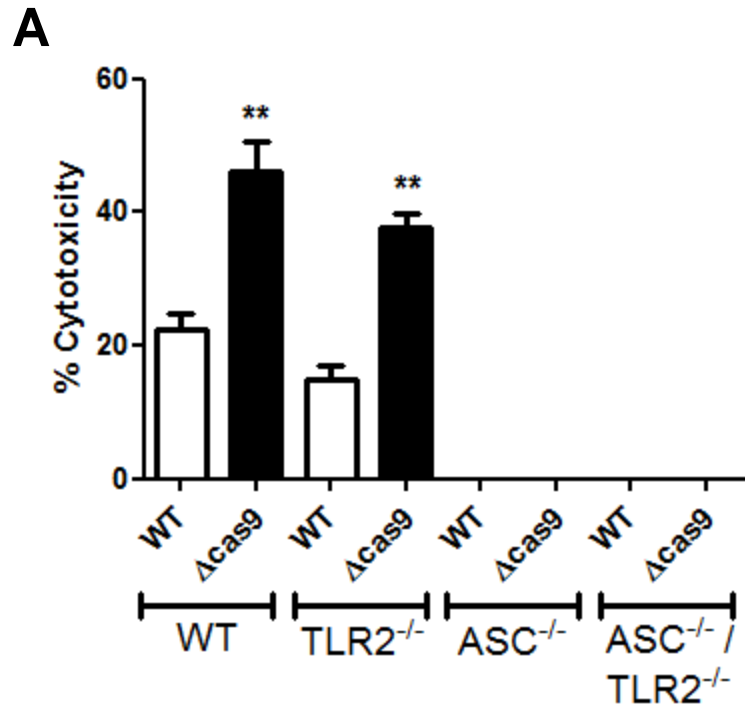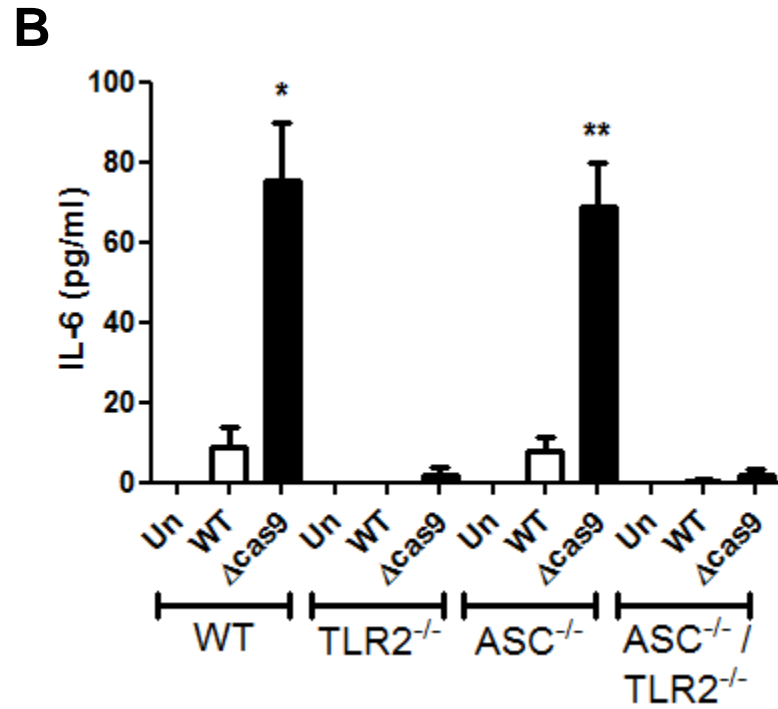

# Supplemental Figure 23.

**A**

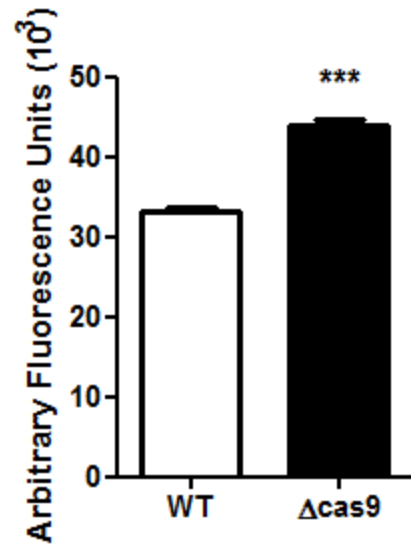

**B**

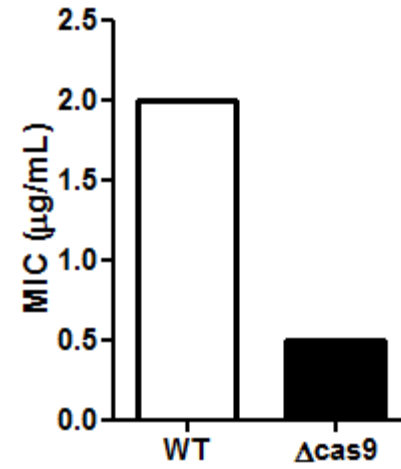

**Supplemental Table 1. Transposon mutants with increased sensitivity to polymyxin B**

| <u>Locus</u> | <u>Name</u> | <u>COG</u> | <u>Description</u>                                                                              | <u>% WT Growth in Polymyxin</u> |
|--------------|-------------|------------|-------------------------------------------------------------------------------------------------|---------------------------------|
| FTN_0019     | <i>pyrB</i> | COG0540F   | aspartate carbamoyltransferase                                                                  | 68.9                            |
| FTN_0021     | <i>carA</i> | COG0505EF  | carbamoyl phosphate synthase small subunit                                                      | 62.4                            |
| FTN_0036     | <i>pyrD</i> | COG0167F   | dihydroorotate oxidase                                                                          | 68.7                            |
| FTN_0097     | -           | COG0814E   | hydroxy/aromatic amino acid permease<br>(HAAAP) family protein                                  | 73.0                            |
| FTN_0098     | <i>gidB</i> | COG0357M   | 16S rRNA methyltransferase GidB                                                                 | 69.0                            |
| FTN_0109     | -           | -          | hypothetical protein FTN_0109                                                                   | 0.2                             |
| FTN_0113     | <i>ribC</i> | COG0307H   | riboflavin synthase subunit alpha                                                               | 0.0                             |
| FTN_0132     | -           | -          | hypothetical protein FTN_0132                                                                   | 63.9                            |
| FTN_0177     | <i>purH</i> | COG0138F   | bifunctional<br>phosphoribosylaminoimidazolecarboxamide<br>formyltransferase/IMP cyclohydrolase | 70.1                            |
| FTN_0178     | <i>purA</i> | COG0104F   | adenylosuccinate synthetase                                                                     | 57.0                            |
| FTN_0196     | <i>cyoB</i> | COG0843C   | cytochrome bo terminal oxidase subunit I                                                        | 73.4                            |
| FTN_0197     | <i>cyoC</i> | COG1845C   | cytochrome bo terminal oxidase subunit III                                                      | 65.7                            |
| FTN_0202     | <i>pdxY</i> | COG2240H   | pyridoxal kinase                                                                                | 68.1                            |
| FTN_0296     | <i>lysP</i> | COG0833E   | lysine:H <sup>+</sup> symporter                                                                 | 28.5                            |
| FTN_0298     | <i>glpX</i> | COG1494G   | fructose 1,6-bisphosphatase II                                                                  | 68.5                            |
| FTN_0300     | -           | COG1215M   | glycosyl transferase                                                                            | 63.5                            |
| FTN_0325     | -           | COG2854Q   | membrane protein                                                                                | 71.9                            |
| FTN_0330     | <i>minD</i> | COG2894D   | septum site-determining protein MinD                                                            | 71.0                            |
| FTN_0331     | <i>minC</i> | COG0850D   | septum site-determining protein MinC                                                            | 64.9                            |

|          |              |           |                                                                                                         |      |
|----------|--------------|-----------|---------------------------------------------------------------------------------------------------------|------|
| FTN_0358 | <i>rimO</i>  | COG0621J  | ribosomal protein S12 methylthiotransferase                                                             | 73.7 |
| FTN_0416 | <i>lpxE</i>  | COG0671I  | lipid A 1-phosphatase                                                                                   | 52.6 |
| FTN_0417 | <i>folD</i>  | COG0190H  | bifunctional 5,10-methylene-tetrahydrofolate dehydrogenase/ 5,10-methylene-tetrahydrofolate cyclohyd... | 29.6 |
| FTN_0419 | <i>purM</i>  | COG0150F  | phosphoribosylaminoimidazole synthetase                                                                 | 72.6 |
| FTN_0421 | <i>purN</i>  | COG0299F  | phosphoribosylglycinamide formyltransferase                                                             | 70.8 |
| FTN_0422 | <i>purE</i>  | COG0041F  | N5-carboxyaminoimidazole ribonucleotide mutase                                                          | 69.0 |
| FTN_0427 | -            | -         | hypothetical protein FTN_0427                                                                           | 60.6 |
| FTN_0434 | <i>parB</i>  | COG1475K  | chromosome partition protein B                                                                          | 68.8 |
| FTN_0436 | -            | COG3240IR | hypothetical protein FTN_0436                                                                           | 68.4 |
| FTN_0444 | -            | -         | membrane protein                                                                                        | 48.1 |
| FTN_0494 | -            | -         | hypothetical protein FTN_0494                                                                           | 62.6 |
| FTN_0495 | -            | COG4692G  | BNR/Asp-box repeat-containing protein                                                                   | 67.0 |
| FTN_0507 | <i>gcvP1</i> | COG0403E  | glycine dehydrogenase subunit 1                                                                         | 72.2 |
| FTN_0514 | <i>pgm</i>   | COG0033G  | phosphoglucomutase                                                                                      | 61.9 |
| FTN_0515 | <i>glgC</i>  | COG0448G  | glucose-1-phosphate adenyltransferase                                                                   | 55.6 |
| FTN_0534 | -            | COG1289S  | hypothetical protein FTN_0534                                                                           | 74.4 |
| FTN_0544 | <i>naxD</i>  | COG3394S  | N-acetylhexosamine deacetylase                                                                          | 36.5 |
| FTN_0545 | -            | COG0463M  | glycosyl transferase                                                                                    | 4.3  |
| FTN_0546 | -            | COG1807M  | dolichyl-phosphate-mannose-protein mannosyltransferase family protein                                   | 1.0  |
| FTN_0554 | -            | COG0219J  | RNA methyltransferase                                                                                   | 57.3 |
| FTN_0561 | <i>apaH</i>  | COG0639T  | diadenosine tetraphosphatase                                                                            | 53.7 |

|          |             |            |                                                               |      |
|----------|-------------|------------|---------------------------------------------------------------|------|
| FTN_0593 | <i>sucD</i> | COG0074C   | succinyl-CoA synthetase, alpha subunit                        | 72.0 |
| FTN_0594 | <i>sucC</i> | COG0045C   | succinyl-CoA synthetase subunit beta                          | 63.5 |
| FTN_0599 | -           | -          | hypothetical protein FTN_0599                                 | 55.6 |
| FTN_0624 | -           | COG0814E   | serine permease                                               | 74.0 |
| FTN_0651 | <i>cdd</i>  | COG0295F   | cytidine deaminase                                            | 69.0 |
| FTN_0669 | <i>deoD</i> | COG0813F   | purine nucleoside phosphorylase                               | 65.0 |
| FTN_0672 | <i>secA</i> | COG0653U   | preprotein translocase subunit SecA                           | 66.8 |
| FTN_0690 | <i>deaD</i> | COG0513LKJ | DEAD/DEAH box helicase                                        | 73.3 |
| FTN_0719 | -           | -          | hypothetical protein FTN_0719                                 | 60.9 |
| FTN_0728 | -           | COG0053P   | Co/Zn/Cd cation transporter                                   | 73.4 |
| FTN_0757 | <i>cas9</i> | -          | CRISPR/Cas associated protein                                 | 69.9 |
| FTN_0772 | -           | COG0545O   | hypothetical protein FTN_0772                                 | 72.5 |
| FTN_0806 | -           | COG1472G   | glycosyl hydrolase family protein                             | 60.0 |
| FTN_0814 | <i>bioF</i> | COG0156H   | 8-amino-7-oxononanoate synthase                               | 73.1 |
| FTN_0815 | <i>bioB</i> | COG0502H   | biotin synthase                                               | 74.4 |
| FTN_0816 | <i>bioA</i> | COG0161H   | adenosylmethionine-8-amino-7-oxononanoate<br>aminotransferase | 66.8 |
| FTN_0842 | <i>aroG</i> | COG0722E   | phospho-2-dehydro-3-deoxyheptonate aldolase                   | 68.3 |
| FTN_0848 | -           | COG0531E   | amino acid antiporter                                         | 65.0 |
| FTN_0855 | -           | -          | hypothetical protein FTN_0855                                 | 74.0 |
| FTN_0945 | <i>rsuA</i> | COG1187J   | 16S rRNA pseudouridine synthase                               | 50.1 |
| FTN_0998 | -           | COG2898S   | potassium channel protein                                     | 69.0 |
| FTN_0999 | <i>udhA</i> | COG1249C   | soluble pyridine nucleotide transhydrogenase                  | 71.0 |

|          |              |           |                                                                                         |      |
|----------|--------------|-----------|-----------------------------------------------------------------------------------------|------|
| FTN_1016 | -            | COG1335Q  | hypothetical protein FTN_1016                                                           | 72.6 |
| FTN_1055 | <i>lon</i>   | COG0466O  | DNA-binding, ATP-dependent protease La                                                  | 70.8 |
| FTN_1056 | <i>clpX</i>  | COG1219O  | ATP-dependent protease ATP-binding subunit<br>ClpX                                      | 5.1  |
| FTN_1057 | <i>clpP</i>  | COG0740OU | ATP-dependent Clp protease proteolytic subunit                                          | 64.1 |
| FTN_1058 | <i>tig</i>   | COG0544O  | trigger factor                                                                          | 74.0 |
| FTN_1064 | -            | COG1702T  | PhoH family protein ATPase                                                              | 72.5 |
| FTN_1066 | -            | COG4535P  | HlyC/CorC family transporter-associated protein                                         | 68.2 |
| FTN_1091 | <i>aroA</i>  | COG0128E  | 3-phosphoshikimate 1-carboxyvinyltransferase                                            | 59.4 |
| FTN_1107 | <i>metIQ</i> | COG1464P  | methionine uptake transporter (MUT) family<br>protein, membrane and periplasmic protein | 69.7 |
| FTN_1111 | -            | COG0769M  | Mur ligase family protein                                                               | 64.3 |
| FTN_1133 | -            | -         | Ohr-like protein                                                                        | 72.3 |
| FTN_1146 | -            | COG0436E  | aspartate aminotransferase                                                              | 68.2 |
| FTN_1199 | -            | -         | hypothetical protein FTN_1199                                                           | 70.9 |
| FTN_1201 | <i>capB</i>  | COG0769M  | capsule biosynthesis protein CapB                                                       | 70.7 |
| FTN_1211 | -            | COG1011R  | haloacid dehalogenase-like hydrolase                                                    | 74.2 |
| FTN_1212 | -            | COG0438M  | glycosyl transferases group 1 family protein                                            | 73.3 |
| FTN_1213 | -            | COG1215M  | glycosyl transferase family protein                                                     | 65.5 |
| FTN_1217 | -            | COG1132V  | ABC transporter ATP-binding protein                                                     | 74.0 |
| FTN_1219 | <i>galE</i>  | COG1087M  | UDP-glucose 4-epimerase                                                                 | 63.7 |
| FTN_1240 | -            | COG0271T  | hypothetical protein FTN_1240                                                           | 50.7 |
| FTN_1240 | -            | COG0271T  | hypothetical protein FTN_1240                                                           | 64.4 |

|          |              |           |                                                                                                |      |
|----------|--------------|-----------|------------------------------------------------------------------------------------------------|------|
| FTN_1254 | -            | -         | hypothetical protein FTN_1254                                                                  | 64.7 |
| FTN_1263 | <i>comL</i>  | COG4105R  | competence lipoprotein ComL                                                                    | 73.0 |
| FTN_1272 | -            | COG3104E  | proton-dependent oligopeptide transporter (POT) family protein, di- or tripeptide:H+ symporter | 68.0 |
| FTN_1277 | -            | COG1538MU | outer membrane efflux protein                                                                  | 59.5 |
| FTN_1311 | -            | -         | hypothetical protein FTN_1311                                                                  | 67.0 |
| FTN_1312 | -            | -         | hypothetical protein FTN_1312                                                                  | 74.7 |
| FTN_1313 | -            | -         | hypothetical protein FTN_1313                                                                  | 52.5 |
| FTN_1314 | -            | -         | hypothetical protein FTN_1314                                                                  | 70.9 |
| FTN_1315 | -            | -         | hypothetical protein FTN_1315                                                                  | 71.8 |
| FTN_1316 | -            | COG3455S  | hypothetical protein FTN_1316                                                                  | 74.2 |
| FTN_1317 | -            | -         | hypothetical protein FTN_1317                                                                  | 70.2 |
| FTN_1323 | <i>iglB</i>  | COG3517S  | intracellular growth locus protein B                                                           | 74.7 |
| FTN_1421 | <i>wbtH</i>  | COG0367E  | glutamine amidotransferase/asparagine synthase                                                 | 72.5 |
| FTN_1425 | <i>wbtF</i>  | COG0451MG | NAD dependent epimerase                                                                        | 67.8 |
| FTN_1427 | <i>wbtD</i>  | COG0438M  | group 1 glycosyl transferase                                                                   | 59.5 |
| FTN_1470 | <i>ispA</i>  | COG0142H  | geranyl diphosphate synthase/farnesyl diphosphate synthase                                     | 2.0  |
| FTN_1471 | <i>pcs</i>   | COG1183I  | phosphatidylcholine synthase                                                                   | 73.8 |
| FTN_1500 | -            | -         | hypothetical protein FTN_1500                                                                  | 66.5 |
| FTN_1513 | <i>xerC</i>  | COG4973L  | site-specific recombinase                                                                      | 73.6 |
| FTN_1518 | <i>relA</i>  | COG0317TK | GDP pyrophosphokinase/GTP pyrophosphokinase                                                    | 68.7 |
| FTN_1538 | <i>groEL</i> | COG0459O  | chaperonin GroEL                                                                               | 71.5 |
| FTN_1551 | <i>ampD</i>  | COG3023V  | N-acetyl-anhydromuramyl-L-alanine amidase                                                      | 57.8 |
| FTN_1597 | <i>prfC</i>  | COG4108J  | peptide chain release factor 3                                                                 | 57.0 |
| FTN_1602 | <i>deoB</i>  | COG1015G  | phosphopentomutase                                                                             | 74.5 |
| FTN_1610 | -            | COG0841V  | RND efflux transporter                                                                         | 74.4 |



|          |             |          |                                                          |      |
|----------|-------------|----------|----------------------------------------------------------|------|
| FTN_1633 | <i>apt</i>  | COG0503F | adenine phosphoribosyltransferase                        | 60.2 |
| FTN_1653 | -           | -        | hypothetical protein FTN_1653                            | 74.7 |
| FTN_1699 | <i>purL</i> | COG0046F | phosphoribosylformylglycinamide synthase                 | 66.0 |
| FTN_1700 | <i>purF</i> | COG0034F | amidophosphoribosyltransferase                           | 73.8 |
| FTN_1715 | <i>kdpD</i> | COG2205T | two component regulator, sensor histidine<br>kinase kdpD | 61.7 |
| FTN_1743 | <i>clpB</i> | COG0542O | chaperone clpB                                           | 70.5 |
| FTN_1745 | <i>purT</i> | COG0027F | phosphoribosylglycinamide formyltransferase 2            | 72.2 |
| FTN_1762 | -           | COG0488R | putative ABC transporter ATP-binding protein             | 68.5 |

**Supplemental Table 2. Percent wild-type growth of each transposon mutant in polymyxin B**

| <u>Locus Tag</u> | <u>Gene name</u> | <u>COG</u> | <u>Gene product</u>                                                                                     | <u>% WT growth in polymyxin</u> | <u>Library Plate</u> | <u>Well</u> |
|------------------|------------------|------------|---------------------------------------------------------------------------------------------------------|---------------------------------|----------------------|-------------|
| FTN_0113         | <i>ribC</i>      | COG0307H   | riboflavin synthase subunit alpha                                                                       | 0                               | NR-8043              | E03         |
| FTN_0109         | -                | -          | hypothetical protein FTN_0109                                                                           | 0.2                             | NR-8048              | G06         |
| FTN_0546         | -                | COG1807M   | dolichyl-phosphate-mannose-protein mannosyltransferase family protein                                   | 1.0                             | NR-8060              | A06         |
| FTN_1470         | <i>ispA</i>      | COG0142H   | geranyl diphosphate synthase/farnesyl diphosphate synthase                                              | 2.0                             | NR-8058              | F05         |
| FTN_0113         | <i>ribC</i>      | COG0307H   | riboflavin synthase subunit alph                                                                        | 4.0                             | NR-8060              | C12         |
| FTN_0545         | -                | COG0463M   | glycosyl transferase                                                                                    | 4.3                             | NR-8040              | D09         |
| FTN_1056         | <i>clpX</i>      | COG1219O   | ATP-dependent protease ATP-binding subunit ClpX                                                         | 5.1                             | NR-8061              | H09         |
| FTN_0545         | -                | COG0463M   | glycosyl transferase                                                                                    | 5.9                             | NR-8055              | G11         |
| FTN_0546         | -                | COG1807M   | dolichyl-phosphate-mannose-protein mannosyltransferase family protein                                   | 11.9                            | NR-8050              | D09         |
| FTN_0296         | <i>lysP</i>      | COG0833E   | lysine:H <sup>+</sup> symporter                                                                         | 28.5                            | NR-8058              | A05         |
| FTN_0417         | <i>folD</i>      | COG0190H   | bifunctional 5,10-methylene-tetrahydrofolate dehydrogenase/ 5,10-methylene-tetrahydrofolate cyclohyd... | 29.6                            | NR-8047              | G04         |
| FTN_0544         | <i>naxD</i>      | COG3394S   | N-acetylhexosamine deacteylase                                                                          | 36.5                            | NR-8055              | F02         |
| FTN_0544         | <i>naxD</i>      | COG3394S   | N-acetylhexosamine deacteylase                                                                          | 40.6                            | NR-8052              | G01         |
| FTN_0444         | -                | -          | membrane protein                                                                                        | 48.1                            | NR-8061              | C10         |
| FTN_0945         | <i>rsuA</i>      | COG1187J   | 16S rRNA pseudouridine synthase                                                                         | 50.1                            | NR-8064              | E06         |
| FTN_1240         | -                | COG0271T   | hypothetical protein FTN_1240                                                                           | 50.7                            | NR-8058              | C11         |
| FTN_0444         | -                | -          | membrane protein                                                                                        | 51.4                            | NR-8047              | C03         |
| FTN_1313         | -                | -          | hypothetical protein FTN_1313                                                                           | 52.5                            | NR-8046              | F07         |
| FTN_0416         | <i>lpxE</i>      | COG0671I   | lipid A 1-phosphatase                                                                                   | 52.6                            | NR-8043              | E11         |
| FTN_0561         | <i>apaH</i>      | COG0639T   | diadenosine tetraphosphatase                                                                            | 53.7                            | NR-8056              | H07         |
| FTN_0599         | -                | -          | hypothetical protein FTN_0599                                                                           | 55.6                            | NR-8052              | G11         |
| FTN_0515         | <i>glgC</i>      | COG0448G   | glucose-1-phosphate adenylyltransferase                                                                 | 55.6                            | NR-8046              | F05         |
| FTN_1597         | <i>prfC</i>      | COG4108J   | peptide chain release factor 3                                                                          | 57.0                            | NR-8063              | F06         |
| FTN_0178         | <i>purA</i>      | COG0104F   | adenylosuccinate synthetase                                                                             | 57.0                            | NR-8037              | A05         |

|          |             |           |                                                       |      |         |     |
|----------|-------------|-----------|-------------------------------------------------------|------|---------|-----|
| FTN_0554 | -           | COG0219J  | RNA methyltransferase                                 | 57.3 | NR-8049 | F08 |
| FTN_1551 | <i>ampD</i> | COG3023V  | N-acetyl-anhydromuranmyl-L-alanine amidase            | 57.8 | NR-8048 | E10 |
| FTN_0178 | <i>purA</i> | COG0104F  | adenylosuccinate synthetase                           | 59.2 | NR-8065 | G11 |
| FTN_1091 | <i>aroA</i> | COG0128E  | 3-phosphoshikimate 1-carboxyvinyltransferase          | 59.4 | NR-8064 | E08 |
| FTN_1277 | -           | COG1538MU | outer membrane efflux protein                         | 59.5 | NR-8049 | G08 |
| FTN_1427 | <i>wbtD</i> | COG0438M  | group 1 glycosyl transferase                          | 59.5 | NR-8065 | G01 |
| FTN_0806 | -           | COG1472G  | glycosyl hydrolase family protein                     | 60.0 | NR-8065 | C03 |
| FTN_1633 | <i>apt</i>  | COG0503F  | adenine phosphoribosyltransferase                     | 60.2 | NR-8064 | G01 |
| FTN_0427 | -           | -         | hypothetical protein FTN_0427                         | 60.6 | NR-8036 | D12 |
| FTN_0513 | <i>glgB</i> | COG0296G  | glycogen branching protein                            | 60.9 | NR-8066 | D01 |
| FTN_0719 | -           | -         | hypothetical protein FTN_0719                         | 60.9 | NR-8047 | A05 |
| FTN_1715 | <i>kdpD</i> | COG2205T  | two component regulator, sensor histidine kinase kdpD | 61.7 | NR-8065 | D11 |
| FTN_0416 | <i>lpxE</i> | COG0671I  | lipid A 1-phosphatase                                 | 61.8 | NR-8054 | B11 |
| FTN_0514 | <i>pgm</i>  | COG0033G  | phosphoglucomutase                                    | 61.9 | NR-8064 | H04 |
| FTN_0021 | <i>carA</i> | COG0505EF | carbamoyl phosphate synthase small subunit            | 62.4 | NR-8064 | D08 |
| FTN_0494 | -           | -         | hypothetical protein FTN_0494                         | 62.6 | NR-8036 | D02 |
| FTN_0594 | <i>sucC</i> | COG0045C  | succinyl-CoA synthetase subunit beta                  | 63.5 | NR-8040 | G06 |
| FTN_0300 | -           | COG1215M  | glycosyl transferase                                  | 63.5 | NR-8060 | F06 |
| FTN_1219 | <i>galE</i> | COG1087M  | UDP-glucose 4-epimerase                               | 63.7 | NR-8064 | C10 |
| FTN_0132 | -           | -         | hypothetical protein FTN_0132                         | 63.9 | NR-8036 | A02 |
| FTN_1057 | <i>clpP</i> | COG07400U | ATP-dependent Clp protease proteolytic subunit        | 64.1 | NR-8044 | E02 |
| FTN_1111 | -           | COG0769M  | Mur ligase family protein                             | 64.3 | NR-8054 | B01 |
| FTN_1240 | -           | COG0271T  | hypothetical protein FTN_1240                         | 64.4 | NR-8049 | E10 |
| FTN_1254 | -           | -         | hypothetical protein FTN_1254                         | 64.7 | NR-8065 | C05 |
| FTN_0331 | <i>minC</i> | COG0850D  | septum site-determining protein MinC                  | 64.9 | NR-8060 | F09 |
| FTN_0945 | <i>rsuA</i> | COG1187J  | 16S rRNA pseudouridine synthase                       | 65.0 | NR-8047 | E08 |
| FTN_0848 | -           | COG0531E  | amino acid antiporter                                 | 65.0 | NR-8054 | C07 |
| FTN_0669 | <i>deoD</i> | COG0813F  | purine nucleoside phosphorylase                       | 65.0 | NR-8065 | E02 |
| FTN_1213 | -           | COG1215M  | glycosyl transferase family protein                   | 65.5 | NR-8066 | D03 |
| FTN_0296 | <i>lysP</i> | COG0833E  | lysine:H <sup>+</sup> symporter                       | 65.7 | NR-8058 | B04 |
| FTN_0506 | <i>gcvH</i> | COG0509E  | glycine cleavage system H protein                     | 65.7 | NR-8061 | C05 |

|          |             |           |                                                                                                            |      |         |     |
|----------|-------------|-----------|------------------------------------------------------------------------------------------------------------|------|---------|-----|
| FTN_0197 | <i>cyoC</i> | COG1845C  | cytochrome bo terminal oxidase subunit III                                                                 | 65.7 | NR-8056 | C11 |
| FTN_1699 | <i>purL</i> | COG0046F  | phosphoribosylformylglycinamide synthase                                                                   | 66.0 | NR-8065 | E03 |
| FTN_0494 | -           | -         | hypothetical protein FTN_0494                                                                              | 66.5 | NR-8057 | B06 |
| FTN_1500 | -           | -         | hypothetical protein FTN_1500                                                                              | 66.5 | NR-8064 | C05 |
| FTN_0672 | <i>secA</i> | COG0653U  | preprotein translocase subunit SecA                                                                        | 66.8 | NR-8046 | G03 |
| FTN_0816 | <i>bioA</i> | COG0161H  | adenosylmethionine-8-amino-7-oxononanoate aminotransferase                                                 | 66.8 | NR-8047 | H01 |
| FTN_0495 | -           | COG4692G  | BNR/Asp-box repeat-containing protein                                                                      | 67.0 | NR-8048 | H03 |
| FTN_1311 | -           | -         | hypothetical protein FTN_1311                                                                              | 67.0 | NR-8051 | G10 |
| FTN_1357 | <i>recB</i> | COG1074L  | ATP-dependent exonuclease V subunit beta                                                                   | 67.2 | NR-8053 | B08 |
| FTN_1056 | <i>clpX</i> | COG1219O  | ATP-dependent protease ATP-binding subunit ClpX                                                            | 67.3 | NR-8036 | A06 |
| FTN_0561 | <i>apaH</i> | COG0639T  | diadenosine tetraphosphatase                                                                               | 67.4 | NR-8056 | H07 |
| FTN_1551 | <i>ampD</i> | COG3023V  | N-acetyl-anhydromuranmyl-L-alanine amidase                                                                 | 67.7 | NR-8066 | E04 |
| FTN_0296 | <i>lysP</i> | COG0833E  | lysine:H <sup>+</sup> symporter                                                                            | 67.7 | NR-8046 | E12 |
| FTN_1425 | <i>wbtF</i> | COG0451MG | NAD dependent epimerase                                                                                    | 67.8 | NR-8066 | E05 |
| FTN_1272 | -           | COG3104E  | proton-dependent oligopeptide transporter (POT) family protein, di- or tripeptide:H <sup>+</sup> symporter | 68.0 | NR-8050 | B10 |
| FTN_0202 | <i>pdxY</i> | COG2240H  | pyridoxal kinase                                                                                           | 68.1 | NR-8054 | D06 |
| FTN_1066 | -           | COG4535P  | HlyC/CorC family transporter-associated protein                                                            | 68.2 | NR-8062 | G03 |
| FTN_1146 | -           | COG0436E  | aspartate aminotransferase                                                                                 | 68.2 | NR-8036 | B07 |
| FTN_0842 | <i>aroG</i> | COG0722E  | phospho-2-dehydro-3-deoxyheptonate aldolase                                                                | 68.3 | NR-8066 | G04 |
| FTN_0436 | -           | COG3240IR | hypothetical protein FTN_0436                                                                              | 68.4 | NR-8062 | C03 |
| FTN_0848 | -           | COG0531E  | amino acid antiporter                                                                                      | 68.4 | NR-8036 | D05 |
| FTN_0298 | <i>glpX</i> | COG1494G  | fructose 1,6-bisphosphatase II                                                                             | 68.5 | NR-8056 | D09 |
| FTN_1762 | -           | COG0488R  | putative ABC transporter ATP-binding protein                                                               | 68.5 | NR-8058 | F09 |
| FTN_0036 | <i>pyrD</i> | COG0167F  | dihydroorotate oxidase                                                                                     | 68.7 | NR-8066 | G12 |
| FTN_1518 | <i>relA</i> | COG0317TK | GDP pyrophosphokinase/GTP pyrophosphokinase                                                                | 68.7 | NR-8055 | F10 |
| FTN_1091 | <i>aroA</i> | COG0128E  | 3-phosphoshikimate 1-carboxyvinyltransferase                                                               | 68.7 | NR-8058 | D09 |
| FTN_0434 | <i>parB</i> | COG1475K  | chromosome partition protein B                                                                             | 68.8 | NR-8065 | H12 |
| FTN_0019 | <i>pyrB</i> | COG0540F  | aspartate carbamoyltransferase                                                                             | 68.9 | NR-8037 | C03 |
| FTN_0098 | <i>gidB</i> | COG0357M  | 16S rRNA methyltransferase GidB                                                                            | 69.0 | NR-8055 | D05 |
| FTN_0651 | <i>cdd</i>  | COG0295F  | cytidine deaminase                                                                                         | 69.0 | NR-8055 | D09 |

|          |              |           |                                                                                           |      |         |     |
|----------|--------------|-----------|-------------------------------------------------------------------------------------------|------|---------|-----|
| FTN_0422 | <i>purE</i>  | COG0041F  | N5-carboxyaminoimidazole ribonucleotide mutase                                            | 69.0 | NR-8066 | H09 |
| FTN_0998 | -            | COG2898S  | potassium channel protein                                                                 | 69.0 | NR-8059 | C12 |
| FTN_1470 | <i>ispA</i>  | COG0142H  | geranyl diphosphate synthase/farnesyl diphosphate synthase                                | 69.2 | NR-8046 | B03 |
| FTN_1107 | <i>metI</i>  | COG1464P  | methionine uptake transporter (MUT) family protein, membrane and periplasmic protein      | 69.7 | NR-8054 | G08 |
| FTN_0098 | <i>gidB</i>  | COG0357M  | 16S rRNA methyltransferase GidB                                                           | 69.8 | NR-8046 | C06 |
| FTN_0757 | <i>cas9</i>  | -         | CRISPR/Cas associated protein                                                             | 69.9 | NR-8058 | H09 |
| FTN_1715 | <i>kdpD</i>  | COG2205T  | two component regulator, sensor histidine kinase kdpD                                     | 69.9 | NR-8043 | H03 |
| FTN_1038 | -            | COG0670R  | hypothetical protein FTN_1038                                                             | 70.0 | NR-8056 | H01 |
| FTN_0177 | <i>purH</i>  | COG0138F  | bifunctional phosphoribosylaminoimidazolecarboxamide formyltransferase/IMP cyclohydrolase | 70.1 | NR-8046 | D12 |
| FTN_0554 | -            | COG0219J  | RNA methyltransferase                                                                     | 70.1 | NR-8066 | A05 |
| FTN_1317 | -            | -         | hypothetical protein FTN_1317                                                             | 70.2 | NR-8062 | E10 |
| FTN_0757 | <i>cas9</i>  | -         | CRISPR/Cas associated protein                                                             | 70.3 | NR-8056 | D11 |
| FTN_1743 | <i>clpB</i>  | COG0542O  | chaperone clpB                                                                            | 70.5 | NR-8064 | F04 |
| FTN_1201 | <i>capB</i>  | COG0769M  | capsule biosynthesis protein CapB                                                         | 70.7 | NR-8053 | E03 |
| FTN_0421 | <i>purN</i>  | COG0299F  | phosphoribosylglycinamide formyltransferase                                               | 70.8 | NR-8064 | D04 |
| FTN_1055 | <i>lon</i>   | COG0466O  | DNA-binding, ATP-dependent protease La                                                    | 70.8 | NR-8045 | E04 |
| FTN_1199 | -            | -         | hypothetical protein FTN_1199                                                             | 70.9 | NR-8054 | G10 |
| FTN_1314 | -            | -         | hypothetical protein FTN_1314                                                             | 70.9 | NR-8054 | A06 |
| FTN_0330 | <i>minD</i>  | COG2894D  | septum site-determining protein MinD                                                      | 71.0 | NR-8043 | D01 |
| FTN_0999 | <i>udhA</i>  | COG1249C  | soluble pyridine nucleotide transhydrogenase                                              | 71.0 | NR-8053 | G08 |
| FTN_1057 | <i>clpP</i>  | COG0740OU | ATP-dependent Clp protease proteolytic subunit                                            | 71.3 | NR-8057 | D05 |
| FTN_1538 | <i>groEL</i> | COG0459O  | chaperonin GroEL                                                                          | 71.5 | NR-8047 | E04 |
| FTN_0515 | <i>glgC</i>  | COG0448G  | glucose-1-phosphate adenylyltransferase                                                   | 71.6 | NR-8065 | C02 |
| FTN_1315 | -            | -         | hypothetical protein FTN_1315                                                             | 71.8 | NR-8062 | A05 |
| FTN_0325 | -            | COG2854Q  | membrane protein                                                                          | 71.9 | NR-8053 | E09 |
| FTN_0593 | <i>sucD</i>  | COG0074C  | succinyl-CoA synthetase, alpha subunit                                                    | 72.0 | NR-8044 | A06 |
| FTN_0507 | <i>gcvPI</i> | COG0403E  | glycine dehydrogenase subunit 1                                                           | 72.2 | NR-8063 | H03 |

|          |             |            |                                                                                           |      |         |     |
|----------|-------------|------------|-------------------------------------------------------------------------------------------|------|---------|-----|
| FTN_1745 | <i>purT</i> | COG0027F   | phosphoribosylglycinamide formyltransferase 2                                             | 72.2 | NR-8063 | H08 |
| FTN_1133 | -           | -          | Ohr-like protein                                                                          | 72.3 | NR-8046 | E04 |
| FTN_1357 | <i>recB</i> | COG1074L   | ATP-dependent exonuclease V subunit beta                                                  | 72.3 | NR-8042 | E09 |
| FTN_1064 | -           | COG1702T   | PhoH family protein ATPase                                                                | 72.5 | NR-8035 | A04 |
| FTN_0772 | -           | COG0545O   | hypothetical protein FTN_0772                                                             | 72.5 | NR-8056 | C02 |
| FTN_1421 | <i>wbtH</i> | COG0367E   | glutamine amidotransferase/asparagine synthase                                            | 72.5 | NR-8062 | H02 |
| FTN_1016 | -           | COG1335Q   | hypothetical protein FTN_1016                                                             | 72.6 | NR-8056 | F09 |
| FTN_0419 | <i>purM</i> | COG0150F   | phosphoribosylaminoimidazole synthetase                                                   | 72.6 | NR-8064 | D05 |
| FTN_0132 | -           | -          | hypothetical protein FTN_0132                                                             | 72.8 | NR-8036 | C02 |
| FTN_0177 | <i>purH</i> | COG0138F   | bifunctional phosphoribosylaminoimidazolecarboxamide formyltransferase/IMP cyclohydrolase | 72.8 | NR-8065 | F08 |
| FTN_0097 | -           | COG0814E   | hydroxy/aromatic amino acid permease (HAAAP) family protein                               | 73.0 | NR-8048 | F08 |
| FTN_1263 | <i>comL</i> | COG4105R   | competence lipoprotein ComL                                                               | 73.0 | NR-8048 | G09 |
| FTN_0331 | <i>minC</i> | COG0850D   | septum site-determining protein MinC                                                      | 73.0 | NR-8042 | F06 |
| FTN_0814 | <i>bioF</i> | COG0156H   | 8-amino-7-oxononanoate synthase                                                           | 73.1 | NR-8056 | F05 |
| FTN_1317 | -           | -          | hypothetical protein FTN_1317                                                             | 73.1 | NR-8036 | B06 |
| FTN_0690 | <i>deaD</i> | COG0513LKJ | DEAD/DEAH box helicase                                                                    | 73.3 | NR-8060 | D08 |
| FTN_1212 | -           | COG0438M   | glycosyl transferases group 1 family protein                                              | 73.3 | NR-8062 | A01 |
| FTN_0021 | <i>carA</i> | COG0505EF  | carbamoyl phosphate synthase small subunit                                                | 73.3 | NR-8046 | A09 |
| FTN_0196 | <i>cyoB</i> | COG0843C   | cytochrome bo terminal oxidase subunit I                                                  | 73.4 | NR-8052 | E03 |
| FTN_0728 | -           | COG0053P   | Co/Zn/Cd cation transporter                                                               | 73.4 | NR-8047 | G03 |
| FTN_0594 | <i>sucC</i> | COG0045C   | succinyl-CoA synthetase subunit beta                                                      | 73.5 | NR-8057 | E02 |
| FTN_1513 | <i>xerC</i> | COG4973L   | site-specific recombinase                                                                 | 73.6 | NR-8048 | E09 |
| FTN_1254 | -           | -          | hypothetical protein FTN_1254                                                             | 73.6 | NR-8066 | C05 |
| FTN_0358 | <i>rimO</i> | COG0621J   | ribosomal protein S12 methylthiotransferase                                               | 73.7 | NR-8055 | E09 |
| FTN_1471 | <i>pcs</i>  | COG1183I   | phosphatidylethanolamine synthase                                                         | 73.8 | NR-8040 | D11 |
| FTN_1700 | <i>purF</i> | COG0034F   | amidophosphoribosyltransferase                                                            | 73.8 | NR-8055 | B12 |
| FTN_1058 | <i>tig</i>  | COG0544O   | trigger factor                                                                            | 74.0 | NR-8053 | B10 |
| FTN_1217 | -           | COG1132V   | ABC transporter ATP-binding protein                                                       | 74.0 | NR-8053 | G01 |
| FTN_0624 | -           | COG0814E   | serine permease                                                                           | 74.0 | NR-8064 | H07 |

|          |             |           |                                                  |      |         |     |
|----------|-------------|-----------|--------------------------------------------------|------|---------|-----|
| FTN_0855 | -           | -         | hypothetical protein FTN_0855                    | 74.0 | NR-8062 | D10 |
| FTN_1211 | -           | COG1011R  | haloacid dehalogenase-like hydrolase             | 74.2 | NR-8053 | G04 |
| FTN_1316 | -           | COG3455S  | hypothetical protein FTN_1316                    | 74.2 | NR-8055 | A04 |
| FTN_0534 | -           | COG1289S  | hypothetical protein FTN_0534                    | 74.4 | NR-8054 | H05 |
| FTN_0815 | <i>bioB</i> | COG0502H  | biotin synthase                                  | 74.4 | NR-8056 | B10 |
| FTN_1610 | -           | COG0841V  | RND efflux transporter                           | 74.4 | NR-8054 | B03 |
| FTN_1602 | <i>deoB</i> | COG1015G  | phosphopentomutase                               | 74.5 | NR-8051 | B10 |
| FTN_0436 | -           | COG3240IR | hypothetical protein FTN_0436                    | 74.6 | NR-8040 | H04 |
| FTN_1055 | <i>lon</i>  | COG0466O  | DNA-binding, ATP-dependent protease La           | 74.7 | NR-8051 | E07 |
| FTN_1312 | -           | -         | hypothetical protein FTN_1312                    | 74.7 | NR-8048 | D06 |
| FTN_1653 | -           | -         | hypothetical protein FTN_1653                    | 74.7 | NR-8047 | A11 |
| FTN_1323 | <i>iglB</i> | COG3517S  | intracellular growth locus protein B             | 74.7 | NR-8055 | A06 |
| FTN_1655 | <i>rluC</i> | COG0564J  | ribosomal large subunit pseudouridine synthase C | 75.0 | NR-8064 | A09 |
| FTN_1684 | -           | COG0019E  | diaminopimelate decarboxylase                    | 75.0 | NR-8064 | C12 |
| FTN_0183 | -           | COG0803P  | periplasmic solute binding family protein        | 75.0 | NR-8055 | A09 |
| FTN_0822 | -           | COG0147EH | para-aminobenzoate synthase component I          | 75.1 | NR-8040 | C06 |
| FTN_0298 | <i>glpX</i> | COG1494G  | fructose 1,6-bisphosphatase II                   | 75.2 | NR-8047 | D09 |
| FTN_0624 | -           | COG0814E  | serine permease                                  | 75.3 | NR-8054 | A08 |
| FTN_0666 | <i>uvrA</i> | COG0178L  | excinuclease ABC subunit A                       | 75.5 | NR-8066 | D09 |
| FTN_1558 | <i>xerD</i> | COG4974L  | site-specific recombinase                        | 75.5 | NR-8043 | C10 |
| FTN_0096 | -           | COG3619S  | hypothetical protein FTN_0096                    | 75.6 | NR-8048 | E08 |
| FTN_0429 | -           | COG4372S  | hypothetical protein FTN_0429                    | 75.6 | NR-8048 | G12 |
| FTN_0506 | <i>gcvH</i> | COG0509E  | glycine cleavage system H protein                | 75.6 | NR-8049 | G01 |
| FTN_1066 | -           | COG4535P  | HlyC/CorC family transporter-associated protein  | 75.7 | NR-8045 | B05 |
| FTN_1091 | <i>aroA</i> | COG0128E  | 3-phosphoshikimate 1-carboxyvinyltransferase     | 75.8 | NR-8046 | A01 |
| FTN_0109 | -           | -         | hypothetical protein FTN_0109                    | 76.0 | NR-8054 | E12 |
| FTN_0122 | <i>recA</i> | COG0468L  | recombinase A                                    | 76.0 | NR-8035 | D07 |
| FTN_1500 | -           | -         | hypothetical protein FTN_1500                    | 76.3 | NR-8048 | C07 |
| FTN_1313 | -           | -         | hypothetical protein FTN_1313                    | 76.4 | NR-8057 | F02 |
| FTN_0122 | <i>recA</i> | COG0468L  | recombinase A                                    | 76.5 | NR-8066 | E09 |
| FTN_1050 | <i>hflX</i> | COG2262R  | protease, GTP-binding subunit                    | 76.6 | NR-8058 | A04 |
| FTN_1097 | -           | COG1335Q  | isochorismatase hydrolase family protein         | 76.6 | NR-8054 | F03 |

|          |              |           |                                                                                      |      |         |     |
|----------|--------------|-----------|--------------------------------------------------------------------------------------|------|---------|-----|
| FTN_1200 | <i>capC</i>  | -         | capsule biosynthesis protein CapC                                                    | 76.6 | NR-8052 | G05 |
| FTN_1318 | -            | -         | hypothetical protein FTN_1318                                                        | 76.6 | NR-8054 | F08 |
| FTN_1558 | <i>xerD</i>  | COG4974L  | site-specific recombinase                                                            | 76.6 | NR-8053 | A03 |
| FTN_0504 | -            | COG1982E  | lysine decarboxylase                                                                 | 76.6 | NR-8066 | D07 |
| FTN_0289 | <i>proQ</i>  | COG3109T  | activator of osmoprotectant transporter ProP                                         | 76.7 | NR-8036 | D01 |
| FTN_0821 | -            | COG0318IQ | AMP-binding protein                                                                  | 76.8 | NR-8036 | E05 |
| FTN_0728 | -            | COG0053P  | Co/Zn/Cd cation transporter                                                          | 76.9 | NR-8053 | A07 |
| FTN_1617 | -            | COG0642T  | two-component regulator, sensor histidine kinase                                     | 76.9 | NR-8054 | A01 |
| FTN_1133 | -            | -         | Ohr-like protein                                                                     | 76.9 | NR-8059 | G08 |
| FTN_1582 | -            | -         | hypothetical protein FTN_1582                                                        | 76.9 | NR-8060 | B01 |
| FTN_0358 | <i>rimO</i>  | COG0621J  | ribosomal protein S12 methylthiotransferase                                          | 77.0 | NR-8048 | E03 |
| FTN_0330 | <i>minD</i>  | COG2894D  | septum site-determining protein MinD                                                 | 77.1 | NR-8043 | C09 |
| FTN_1277 | -            | COG1538MU | outer membrane efflux protein                                                        | 77.2 | NR-8054 | F05 |
| FTN_1608 | <i>dsbB</i>  | COG1495O  | disulfide bond formation protein                                                     | 77.3 | NR-8064 | A08 |
| FTN_0210 | -            | -         | hypothetical protein FTN_0210                                                        | 77.3 | NR-8042 | E07 |
| FTN_0419 | <i>purM</i>  | COG0150F  | phosphoribosylaminoimidazole synthetase                                              | 77.4 | NR-8042 | E12 |
| FTN_0495 | -            | COG4692G  | BNR/Asp-box repeat-containing protein                                                | 77.4 | NR-8061 | D05 |
| FTN_1107 | <i>metIQ</i> | COG1464P  | methionine uptake transporter (MUT) family protein, membrane and periplasmic protein | 77.4 | NR-8065 | F04 |
| FTN_0119 | -            | COG2825M  | hypothetical protein FTN_0119                                                        | 77.5 | NR-8057 | D03 |
| FTN_1146 | -            | COG0436E  | aspartate aminotransferase                                                           | 77.5 | NR-8057 | B10 |
| FTN_0337 | <i>fumA</i>  | COG1951C  | fumerate hydratase                                                                   | 77.6 | NR-8045 | D06 |
| FTN_1699 | <i>purL</i>  | COG0046F  | phosphoribosylformylglycinamide synthase                                             | 77.6 | NR-8040 | D02 |
| FTN_1242 | -            | COG0586S  | DedA family protein                                                                  | 77.6 | NR-8052 | B12 |
| FTN_0234 | <i>pgsA</i>  | COG0558I  | phosphatidylglycerophosphate synthetase                                              | 77.6 | NR-8040 | B01 |
| FTN_0720 | -            | COG1414K  | IclR family transcriptional regulator                                                | 77.6 | NR-8054 | G01 |
| FTN_1750 | -            | COG0204I  | acyltransferase                                                                      | 77.7 | NR-8044 | B05 |
| FTN_0297 | -            | COG2945R  | hypothetical protein FTN_0297                                                        | 77.8 | NR-8062 | B05 |
| FTN_1318 | -            | -         | hypothetical protein FTN_1318                                                        | 77.8 | NR-8048 | H06 |
| FTN_1209 | <i>cphB</i>  | COG4242QP | cyanophycinase                                                                       | 77.8 | NR-8055 | F05 |
| FTN_1362 | -            | -         | hypothetical protein FTN_1362                                                        | 77.9 | NR-8055 | E08 |
| FTN_1362 | -            | -         | hypothetical protein FTN_1362                                                        | 78.0 | NR-8038 | G09 |



|          |             |           |                                                                   |      |         |     |
|----------|-------------|-----------|-------------------------------------------------------------------|------|---------|-----|
| FTN_1322 | <i>iglC</i> | -         | intracellular growth locus protein C                              | 78.1 | NR-8052 | H02 |
| FTN_1426 | <i>wbtE</i> | COG0677M  | UDP-glucose/GDP-mannose dehydrogenase                             | 78.1 | NR-8054 | H10 |
| FTN_0728 | -           | COG0053P  | Co/Zn/Cd cation transporter                                       | 78.1 | NR-8048 | H04 |
| FTN_1326 | <i>anmK</i> | COG2377O  | anhydro-N-acetylmuramic acid kinase                               | 78.1 | NR-8048 | C11 |
| FTN_0020 | <i>carB</i> | COG0458EF | carbamoyl phosphate synthase large subunit                        | 78.2 | NR-8042 | D03 |
| FTN_0756 | <i>fopA</i> | COG2885M  | OmpA family protein                                               | 78.3 | NR-8063 | G12 |
| FTN_1219 | <i>galE</i> | COG1087M  | UDP-glucose 4-epimerase                                           | 78.3 | NR-8064 | E10 |
| FTN_1425 | <i>wbtF</i> | COG0451MG | NAD dependent epimerase                                           | 78.3 | NR-8040 | E08 |
| FTN_1219 | <i>galE</i> | COG1087M  | UDP-glucose 4-epimerase                                           | 78.3 | NR-8050 | C05 |
| FTN_0210 | -           | -         | hypothetical protein FTN_0210                                     | 78.4 | NR-8042 | D07 |
| FTN_1613 | -           | COG1619V  | U61 family peptidase                                              | 78.4 | NR-8046 | D11 |
| FTN_1656 | -           | COG1485R  | ATPase                                                            | 78.5 | NR-8050 | B11 |
| FTN_0664 | <i>fimT</i> | COG4970NU | Type IV pili, pilus assembly protein                              | 78.5 | NR-8057 | A06 |
| FTN_1058 | <i>tig</i>  | COG0544O  | trigger factor                                                    | 78.6 | NR-8040 | A06 |
| FTN_0560 | <i>ksgA</i> | COG0030J  | dimethyladenosine transferase                                     | 78.7 | NR-8053 | D06 |
| FTN_0210 | -           | -         | hypothetical protein FTN_0210                                     | 78.7 | NR-8063 | G07 |
| FTN_1273 | -           | COG0318IQ | long chain fatty acid CoA ligase                                  | 78.8 | NR-8066 | A07 |
| FTN_0427 | -           | -         | hypothetical protein FTN_0427                                     | 78.9 | NR-8054 | A05 |
| FTN_0429 | -           | COG4372S  | hypothetical protein FTN_0429                                     | 78.9 | NR-8053 | F10 |
| FTN_1090 | -           | -         | hypothetical protein FTN_1090                                     | 79.0 | NR-8036 | C05 |
| FTN_1264 | <i>rluD</i> | COG0564J  | ribosomal large subunit pseudouridine synthase D                  | 79.0 | NR-8065 | C11 |
| FTN_1201 | <i>capB</i> | COG0769M  | capsule biosynthesis protein CapB                                 | 79.0 | NR-8044 | C01 |
| FTN_1617 | -           | COG0642T  | two-component regulator, sensor histidine kinase                  | 79.0 | NR-8042 | E05 |
| FTN_0096 | -           | COG3619S  | hypothetical protein FTN_0096                                     | 79.1 | NR-8057 | C09 |
| FTN_1309 | <i>pdpA</i> | -         | hypothetical protein FTN_1309                                     | 79.1 | NR-8065 | E06 |
| FTN_1029 | -           | COG3155Q  | isoprenoid biosynthesis protein with amidotransferase-like domain | 79.2 | NR-8057 | F06 |
| FTN_0505 | <i>gcvT</i> | COG0404E  | glycine cleavage system aminomethyltransferase T                  | 79.3 | NR-8041 | C06 |
| FTN_1209 | <i>cphB</i> | COG4242QP | cyanophycinase                                                    | 79.4 | NR-8038 | E10 |
| FTN_1048 | <i>hflK</i> | COG0330O  | HflK-HflC membrane protein complex, HflK                          | 79.5 | NR-8041 | E03 |
| FTN_0560 | <i>ksgA</i> | COG0030J  | dimethyladenosine transferase                                     | 79.5 | NR-8056 | C05 |

|          |              |            |                                                                   |      |         |     |
|----------|--------------|------------|-------------------------------------------------------------------|------|---------|-----|
| FTN_0689 | <i>ppiC</i>  | COG07600   | parvulin-like peptidyl-prolyl isomerase domain-containing protein | 79.6 | NR-8059 | D08 |
| FTN_0534 | -            | COG1289S   | hypothetical protein FTN_0534                                     | 79.6 | NR-8047 | F04 |
| FTN_1513 | <i>xerC</i>  | COG4973L   | site-specific recombinase                                         | 79.6 | NR-8065 | E12 |
| FTN_1684 | -            | COG0019E   | diaminopimelate decarboxylase                                     | 79.6 | NR-8064 | E12 |
| FTN_1111 | -            | COG0769M   | Mur ligase family protein                                         | 79.6 | NR-8040 | F04 |
| FTN_0593 | <i>sucD</i>  | COG0074C   | succinyl-CoA synthetase, alpha subunit                            | 79.7 | NR-8057 | H02 |
| FTN_0893 | -            | -          | hypothetical protein FTN_0893                                     | 79.7 | NR-8061 | D08 |
| FTN_1324 | <i>igla</i>  | COG3516S   | intracellular growth locus protein A                              | 79.7 | NR-8061 | A04 |
| FTN_0690 | <i>deaD</i>  | COG0513LKJ | DEAD/DEAH box helicase                                            | 79.8 | NR-8041 | G12 |
| FTN_1586 | -            | COG2814G   | major facilitator superfamily sugar transporter                   | 79.8 | NR-8051 | B07 |
| FTN_1705 | -            | COG0826O   | U32 family peptidase                                              | 79.8 | NR-8047 | E01 |
| FTN_0672 | <i>secA</i>  | COG0653U   | preprotein translocase subunit SecA                               | 79.8 | NR-8052 | F04 |
| FTN_1715 | <i>kdpD</i>  | COG2205T   | two component regulator, sensor histidine kinase kdpD             | 79.8 | NR-8055 | B07 |
| FTN_1064 | -            | COG1702T   | PhoH family protein ATPase                                        | 79.9 | NR-8061 | E03 |
| FTN_0514 | <i>pgm</i>   | COG0033G   | phosphoglucomutase                                                | 80.1 | NR-8045 | C12 |
| FTN_1218 | -            | COG0438M   | group 1 glycosyl transferase                                      | 80.1 | NR-8062 | E08 |
| FTN_1433 | -            | -          | hypothetical protein FTN_1433                                     | 80.1 | NR-8060 | B06 |
| FTN_0599 | -            | -          | hypothetical protein FTN_0599                                     | 80.1 | NR-8066 | G06 |
| FTN_1613 | -            | COG1619V   | U61 family peptidase                                              | 80.1 | NR-8057 | H10 |
| FTN_1313 | -            | -          | hypothetical protein FTN_1313                                     | 80.4 | NR-8043 | D06 |
| FTN_0494 | -            | -          | hypothetical protein FTN_0494                                     | 80.4 | NR-8063 | C09 |
| FTN_1038 | -            | COG0670R   | hypothetical protein FTN_1038                                     | 80.4 | NR-8036 | D07 |
| FTN_1382 | -            | -          | hypothetical protein FTN_1382                                     | 80.6 | NR-8055 | C03 |
| FTN_1548 | <i>groEL</i> | COG0459O   | chaperonin GroEL                                                  | 80.6 | NR-8040 | B07 |
| FTN_0818 | -            | COG0657I   | lipase/esterase                                                   | 80.6 | NR-8036 | D08 |
| FTN_1316 | -            | COG3455S   | hypothetical protein FTN_1316                                     | 80.6 | NR-8040 | F08 |
| FTN_1097 | -            | COG1335Q   | isochorismatase hydrolase family protein                          | 80.7 | NR-8052 | A01 |
| FTN_0756 | <i>fopA</i>  | COG2885M   | OmpA family protein                                               | 80.7 | NR-8061 | H10 |
| FTN_1048 | <i>hflK</i>  | COG0330O   | HflK-HflC membrane protein complex, HflK                          | 80.7 | NR-8059 | D12 |
| FTN_1218 | -            | COG0438M   | group 1 glycosyl transferase                                      | 80.8 | NR-8041 | C04 |

|          |             |           |                                                                                           |      |         |     |
|----------|-------------|-----------|-------------------------------------------------------------------------------------------|------|---------|-----|
| FTN_1319 | <i>pdpC</i> | -         | hypothetical protein FTN_1319                                                             | 80.9 | NR-8054 | F01 |
| FTN_0177 | <i>purH</i> | COG0138F  | bifunctional phosphoribosylaminoimidazolecarboxamide formyltransferase/IMP cyclohydrolase | 80.9 | NR-8040 | H02 |
| FTN_1242 | -           | COG0586S  | DedA family protein                                                                       | 80.9 | NR-8043 | G08 |
| FTN_1252 | -           | COG3049M  | choloylglycine hydrolase family protein                                                   | 81.1 | NR-8058 | G09 |
| FTN_1257 | -           | -         | hypothetical protein FTN_1257                                                             | 81.1 | NR-8057 | B07 |
| FTN_0855 | -           | -         | hypothetical protein FTN_0855                                                             | 81.2 | NR-8047 | A04 |
| FTN_0407 | -           | COG0833E  | amino acid ABC transporter permease                                                       | 81.3 | NR-8053 | G07 |
| FTN_0925 | -           | -         | hypothetical protein FTN_0925                                                             | 81.4 | NR-8058 | H11 |
| FTN_1321 | <i>iglD</i> | -         | intracellular growth locus protein D                                                      | 81.5 | NR-8063 | B02 |
| FTN_1410 | <i>bfr</i>  | COG2193P  | bacterioferritin                                                                          | 81.5 | NR-8061 | C12 |
| FTN_0818 | -           | COG0657I  | lipase/esterase                                                                           | 81.6 | NR-8036 | C08 |
| FTN_0266 | <i>htpG</i> | COG0326O  | heat shock protein 90                                                                     | 81.6 | NR-8050 | F02 |
| FTN_0325 | -           | COG2854Q  | membrane protein                                                                          | 81.7 | NR-8046 | C03 |
| FTN_1750 | -           | COG0204I  | acyltransferase                                                                           | 81.8 | NR-8064 | A10 |
| FTN_0297 | -           | COG2945R  | hypothetical protein FTN_0297                                                             | 81.8 | NR-8042 | C01 |
| FTN_0643 | -           | -         | hypothetical protein FTN_0643                                                             | 81.9 | NR-8055 | A08 |
| FTN_0842 | <i>aroG</i> | COG0722E  | phospho-2-dehydro-3-deoxyheptonate aldolase                                               | 82.0 | NR-8041 | G10 |
| FTN_1501 | -           | COG0025P  | monovalent cation:proton antiporter-1                                                     | 82.0 | NR-8045 | E10 |
| FTN_1157 | -           | COG1217T  | GTP binding translational elongation factor Tu and G family protein                       | 82.0 | NR-8061 | D10 |
| FTN_0817 | -           | COG2050Q  | hypothetical protein FTN_0817                                                             | 82.1 | NR-8040 | F09 |
| FTN_1597 | <i>prfC</i> | COG4108J  | peptide chain release factor 3                                                            | 82.1 | NR-8043 | F01 |
| FTN_0544 | <i>naxD</i> | COG3394S  | galactosamine deacetylase                                                                 | 82.2 | NR-8062 | D08 |
| FTN_0756 | <i>fopA</i> | COG2885M  | OmpA family protein                                                                       | 82.2 | NR-8038 | G11 |
| FTN_1633 | <i>apt</i>  | COG0503F  | adenine phosphoribosyltransferase                                                         | 82.2 | NR-8035 | B09 |
| FTN_0020 | <i>carB</i> | COG0458EF | carbamoyl phosphate synthase large subunit                                                | 82.3 | NR-8043 | B03 |
| FTN_0505 | <i>gcvT</i> | COG0404E  | glycine cleavage system aminomethyltransferase T                                          | 82.3 | NR-8045 | E03 |
| FTN_1745 | <i>purT</i> | COG0027F  | phosphoribosylglycinamide formyltransferase 2                                             | 82.3 | NR-8050 | E09 |
| FTN_1548 | -           | COG1520S  | hypothetical protein FTN_1548                                                             | 82.4 | NR-8043 | A01 |
| FTN_1657 | -           | COG2271G  | major facilitator transporter                                                             | 82.5 | NR-8052 | G02 |

|          |              |           |                                                                               |      |         |     |
|----------|--------------|-----------|-------------------------------------------------------------------------------|------|---------|-----|
| FTN_1319 | <i>pdpC</i>  | -         | hypothetical protein FTN_1319                                                 | 82.5 | NR-8035 | G09 |
| FTN_0507 | <i>gcvPI</i> | COG0403E  | glycine dehydrogenase subunit 1                                               | 82.6 | NR-8040 | E04 |
| FTN_0822 | -            | COG0147EH | para-aminobenzoate synthase component I                                       | 82.7 | NR-8062 | H01 |
| FTN_1320 | -            | -         | hypothetical protein FTN_1320                                                 | 82.7 | NR-8059 | E10 |
| FTN_1744 | <i>chiB</i>  | COG3469G  | chitinase                                                                     | 82.7 | NR-8058 | G04 |
| FTN_0817 | -            | COG2050Q  | hypothetical protein FTN_0817                                                 | 82.7 | NR-8051 | A06 |
| FTN_1656 | -            | COG1485R  | ATPase                                                                        | 82.9 | NR-8060 | C04 |
| FTN_0643 | -            | -         | hypothetical protein FTN_0643                                                 | 83.0 | NR-8042 | A02 |
| FTN_0818 | -            | COG0657I  | lipase/esterase                                                               | 83.0 | NR-8046 | C10 |
| FTN_1312 | -            | -         | hypothetical protein FTN_1312                                                 | 83.1 | NR-8057 | H04 |
| FTN_0664 | <i>fimT</i>  | COG4970NU | Type IV pili, pilus assembly protein                                          | 83.1 | NR-8045 | C11 |
| FTN_1586 | -            | COG2814G  | major facilitator superfamily sugar transporter                               | 83.1 | NR-8043 | B02 |
| FTN_0633 | <i>katG</i>  | COG0376P  | peroxidase/catalase                                                           | 83.2 | NR-8040 | A05 |
| FTN_1743 | <i>clpB</i>  | COG0542O  | chaperone clpB                                                                | 83.2 | NR-8059 | H05 |
| FTN_1607 | <i>cca</i>   | COG0617J  | tRNA CCA-pyrophosphorylase                                                    | 83.3 | NR-8046 | G12 |
| FTN_0624 | -            | COG0814E  | serine permease                                                               | 83.3 | NR-8040 | H08 |
| FTN_0535 | -            | COG2814G  | drug:H <sup>+</sup> antiporter-1 (DHA1) family protein                        | 83.3 | NR-8053 | A09 |
| FTN_0198 | <i>cyoD</i>  | COG3125C  | cytochrome bo terminal oxidase subunit IV                                     | 83.4 | NR-8061 | F07 |
| FTN_0593 | <i>sucD</i>  | COG0074C  | succinyl-CoA synthetase, alpha subunit                                        | 83.4 | NR-8061 | B09 |
| FTN_0422 | <i>purE</i>  | COG0041F  | N5-carboxyaminoimidazole ribonucleotide mutase                                | 83.4 | NR-8042 | F12 |
| FTN_1438 | -            | COG1250I  | fusion product of 3-hydroxacyl-CoA dehydrogenase and acyl-CoA-binding protein | 83.4 | NR-8041 | E09 |
| FTN_1050 | <i>hflX</i>  | COG2262R  | protease, GTP-binding subunit                                                 | 83.6 | NR-8042 | E08 |
| FTN_1256 | -            | -         | hypothetical protein FTN_1256                                                 | 83.7 | NR-8062 | H12 |
| FTN_1325 | <i>pdpD</i>  | -         | hypothetical protein FTN_1325                                                 | 83.7 | NR-8058 | H01 |
| FTN_1654 | -            | COG2271G  | major facilitator transporter                                                 | 83.7 | NR-8058 | G07 |
| FTN_1311 | -            | -         | hypothetical protein FTN_1311                                                 | 83.7 | NR-8043 | F12 |
| FTN_0132 | -            | -         | hypothetical protein FTN_0132                                                 | 83.9 | NR-8063 | G03 |
| FTN_1112 | <i>cphA</i>  | COG0769M  | cyanophycin synthetase                                                        | 83.9 | NR-8061 | B03 |
| FTN_1263 | <i>comL</i>  | COG4105R  | competence lipoprotein ComL                                                   | 83.9 | NR-8060 | G10 |
| FTN_1276 | -            | COG1566V  | membrane fusion protein                                                       | 83.9 | NR-8061 | A02 |
| FTN_1682 | <i>frgA</i>  | COG4264Q  | siderophore biosynthesis protein                                              | 83.9 | NR-8058 | H10 |

|          |             |          |                                                             |      |         |     |
|----------|-------------|----------|-------------------------------------------------------------|------|---------|-----|
| FTN_0812 | <i>bioD</i> | COG0132H | dethiobiotin synthetase                                     | 84.0 | NR-8051 | C10 |
| FTN_0719 | -           | -        | hypothetical protein FTN_0719                               | 84.0 | NR-8039 | G09 |
| FTN_0925 | -           | -        | hypothetical protein FTN_0925                               | 84.0 | NR-8045 | G06 |
| FTN_0097 | -           | COG0814E | hydroxy/aromatic amino acid permease (HAAAP) family protein | 84.0 | NR-8059 | H10 |
| FTN_0771 | -           | COG1651O | protein-disulfide isomerase                                 | 84.2 | NR-8058 | F12 |
| FTN_1326 | <i>anmK</i> | COG2377O | anhydro-N-acetylmuramic acid kinase                         | 84.2 | NR-8061 | F03 |
| FTN_1744 | <i>chiB</i> | COG3469G | chitinase                                                   | 84.3 | NR-8045 | D11 |
| FTN_1058 | <i>tig</i>  | COG0544O | trigger factor                                              | 84.3 | NR-8038 | G01 |
| FTN_1427 | <i>wbtD</i> | COG0438M | group 1 glycosyl transferase                                | 84.3 | NR-8035 | B05 |
| FTN_0035 | <i>pyrF</i> | COG0284F | orotidine-5'-phosphate decarboxylase                        | 84.3 | NR-8063 | E04 |
| FTN_1321 | <i>iglD</i> | -        | intracellular growth locus protein D                        | 84.3 | NR-8061 | E05 |
| FTN_0430 | -           | -        | hypothetical protein FTN_0430                               | 84.5 | NR-8040 | E09 |
| FTN_1016 | -           | COG1335Q | hypothetical protein FTN_1016                               | 84.6 | NR-8043 | A09 |
| FTN_0211 | <i>pcp</i>  | COG2039O | pyrrolidone carboxylate peptidase                           | 84.7 | NR-8053 | E10 |
| FTN_0407 | -           | COG0833E | amino acid ABC transporter permease                         | 84.8 | NR-8041 | F04 |
| FTN_1657 | -           | COG2271G | major facilitator transporter                               | 84.8 | NR-8044 | G09 |
| FTN_0197 | <i>cyoC</i> | COG1845C | cytochrome bo terminal oxidase subunit III                  | 84.9 | NR-8050 | D07 |
| FTN_0816 | <i>bioA</i> | COG0161H | adenosylmethionine-8-amino-7-oxononanoate aminotransferase  | 85.0 | NR-8060 | E06 |
| FTN_0666 | <i>uvrA</i> | COG0178L | excinuclease ABC subunit A                                  | 85.0 | NR-8045 | E09 |
| FTN_1211 | -           | COG1011R | haloacid dehalogenase-like hydrolase                        | 85.1 | NR-8035 | E11 |
| FTN_1427 | <i>wbtD</i> | COG0438M | group 1 glycosyl transferase                                | 85.2 | NR-8058 | D12 |
| FTN_1310 | <i>pdpB</i> | COG3523S | hypothetical protein FTN_1310                               | 85.3 | NR-8039 | G10 |
| FTN_1220 | -           | COG2148M | lipopolysaccharide synthesis sugar transferase              | 85.3 | NR-8040 | C12 |
| FTN_1683 | -           | COG2814G | drug:H <sup>+</sup> antiporter-1 (DHA1) family protein      | 85.3 | NR-8044 | D12 |
| FTN_0812 | <i>bioD</i> | COG0132H | dethiobiotin synthetase                                     | 85.5 | NR-8035 | A12 |
| FTN_1421 | <i>wbtH</i> | COG0367E | glutamine amidotransferase/asparagine synthase              | 85.5 | NR-8040 | C03 |
| FTN_1705 | -           | COG0826O | U32 family peptidase                                        | 85.5 | NR-8062 | G04 |
| FTN_1007 | <i>rplY</i> | COG1825J | 50S ribosomal protein L25                                   | 85.6 | NR-8036 | H08 |
| FTN_0019 | <i>pyrB</i> | COG0540F | aspartate carbamoyltransferase                              | 85.7 | NR-8063 | A02 |
| FTN_0431 | -           | COG3307M | hypothetical protein FTN_0431                               | 85.8 | NR-8060 | H05 |

|          |              |           |                                                                                      |      |         |     |
|----------|--------------|-----------|--------------------------------------------------------------------------------------|------|---------|-----|
| FTN_1107 | <i>metIQ</i> | COG1464P  | methionine uptake transporter (MUT) family protein, membrane and periplasmic protein | 86.1 | NR-8044 | A02 |
| FTN_0266 | <i>htpG</i>  | COG0326O  | heat shock protein 90                                                                | 86.2 | NR-8044 | A08 |
| FTN_1518 | <i>relA</i>  | COG0317TK | GDP pyrophosphokinase/GTP pyrophosphokinase                                          | 86.2 | NR-8041 | C09 |
| FTN_0620 | -            | COG2271G  | major facilitator transporter                                                        | 86.3 | NR-8058 | C09 |
| FTN_1277 | -            | COG1538MU | outer membrane efflux protein                                                        | 86.3 | NR-8063 | D05 |
| FTN_1548 | -            | COG1520S  | hypothetical protein FTN_1548                                                        | 86.5 | NR-8061 | F12 |
| FTN_1426 | <i>wbtE</i>  | COG0677M  | UDP-glucose/GDP-mannose dehydrogenase                                                | 86.5 | NR-8045 | H08 |
| FTN_1750 | -            | COG0204I  | acyltransferase                                                                      | 86.6 | NR-8057 | D04 |
| FTN_1214 | -            | COG1215M  | glycosyl transferase family protein                                                  | 86.7 | NR-8053 | B07 |
| FTN_1254 | -            | -         | hypothetical protein FTN_1254                                                        | 86.8 | NR-8036 | G07 |
| FTN_0812 | <i>bioD</i>  | COG0132H  | dethiobiotin synthetase                                                              | 86.9 | NR-8050 | H08 |
| FTN_0620 | -            | COG2271G  | major facilitator transporter                                                        | 86.9 | NR-8035 | E06 |
| FTN_1157 | -            | COG1217T  | GTP binding translational elongation factor Tu and G family protein                  | 87.0 | NR-8041 | F11 |
| FTN_0358 | <i>rimO</i>  | COG0621J  | ribosomal protein S12 methylthiotransferase                                          | 87.1 | NR-8045 | G10 |
| FTN_0731 | -            | COG5006R  | hypothetical protein FTN_0731                                                        | 87.1 | NR-8044 | D01 |
| FTN_0410 | -            | COG0436E  | aspartate aminotransferase                                                           | 87.2 | NR-8035 | B06 |
| FTN_0689 | <i>ppiC</i>  | COG0760O  | parvulin-like peptidyl-prolyl isomerase domain-containing protein                    | 87.2 | NR-8035 | B03 |
| FTN_1090 | -            | -         | hypothetical protein FTN_1090                                                        | 87.3 | NR-8052 | C12 |
| FTN_0823 | <i>pabA</i>  | COG0512EH | anthranilate synthase component II                                                   | 87.4 | NR-8035 | H06 |
| FTN_0120 | -            | COG0607P  | rhodanese-related sulfurtransferase                                                  | 87.5 | NR-8053 | A11 |
| FTN_1431 | <i>wbtA</i>  | COG1086MG | dTDP-glucose 4,6-dehydratase                                                         | 87.5 | NR-8057 | B09 |
| FTN_1501 | -            | COG0025P  | monovalent cation:proton antiporter-1                                                | 87.5 | NR-8057 | H12 |
| FTN_1683 | -            | COG2814G  | drug:H <sup>+</sup> antiporter-1 (DHA1) family protein                               | 87.5 | NR-8058 | E01 |
| FTN_1256 | -            | -         | hypothetical protein FTN_1256                                                        | 87.5 | NR-8041 | B06 |
| FTN_0806 | -            | COG1472G  | glycosyl hydrolase family protein                                                    | 87.6 | NR-8036 | H01 |
| FTN_1745 | <i>purT</i>  | COG0027F  | phosphoribosylglycinamide formyltransferase 2                                        | 87.6 | NR-8063 | A05 |
| FTN_0431 | -            | COG3307M  | hypothetical protein FTN_0431                                                        | 87.7 | NR-8044 | A10 |
| FTN_0651 | <i>cdd</i>   | COG0295F  | cytidine deaminase                                                                   | 87.8 | NR-8051 | D03 |
| FTN_1315 | -            | -         | hypothetical protein FTN_1315                                                        | 87.8 | NR-8048 | G08 |

|          |             |           |                                                                               |      |         |     |
|----------|-------------|-----------|-------------------------------------------------------------------------------|------|---------|-----|
| FTN_0410 | -           | COG0436E  | aspartate aminotransferase                                                    | 88.0 | NR-8059 | B07 |
| FTN_1214 | -           | COG1215M  | glycosyl transferase family protein                                           | 88.0 | NR-8063 | B10 |
| FTN_1131 | <i>putA</i> | COG4230C  | bifunctional proline dehydrogenase/pyrroline-5-carboxylate dehydrogenase      | 88.1 | NR-8044 | C10 |
| FTN_0289 | <i>proQ</i> | COG3109T  | activator of osmoprotectant transporter ProP                                  | 88.1 | NR-8058 | E05 |
| FTN_1750 | -           | COG0204I  | acyltransferase                                                               | 88.3 | NR-8053 | H02 |
| FTN_1682 | <i>frgA</i> | COG4264Q  | siderophore biosynthesis protein                                              | 88.4 | NR-8047 | B07 |
| FTN_0183 | -           | COG0803P  | periplasmic solute binding family protein                                     | 88.5 | NR-8058 | C01 |
| FTN_0669 | <i>deoD</i> | COG0813F  | purine nucleoside phosphorylase                                               | 88.5 | NR-8038 | H09 |
| FTN_0599 | -           | -         | hypothetical protein FTN_0599                                                 | 88.6 | NR-8048 | A10 |
| FTN_1654 | -           | COG2271G  | major facilitator transporter                                                 | 88.6 | NR-8050 | A12 |
| FTN_1438 | -           | COG1250I  | fusion product of 3-hydroxacyl-CoA dehydrogenase and acyl-CoA-binding protein | 88.6 | NR-8052 | F03 |
| FTN_0999 | <i>udhA</i> | COG1249C  | soluble pyridine nucleotide transhydrogenase                                  | 88.7 | NR-8035 | G04 |
| FTN_1214 | -           | COG1215M  | glycosyl transferase family protein                                           | 88.7 | NR-8048 | A07 |
| FTN_1159 | <i>ggt</i>  | COG0405E  | gamma-glutamyltranspeptidase                                                  | 88.9 | NR-8050 | H10 |
| FTN_0202 | <i>pdxY</i> | COG2240H  | pyridoxal kinase                                                              | 89.0 | NR-8039 | D03 |
| FTN_0430 | -           | -         | hypothetical protein FTN_0430                                                 | 89.1 | NR-8057 | F04 |
| FTN_0643 | -           | -         | hypothetical protein FTN_0643                                                 | 89.1 | NR-8051 | F07 |
| FTN_1323 | <i>iglB</i> | COG3517S  | intracellular growth locus protein B                                          | 89.3 | NR-8044 | G02 |
| FTN_1582 | -           | -         | hypothetical protein FTN_1582                                                 | 89.3 | NR-8042 | E11 |
| FTN_1610 | -           | COG0841V  | RND efflux transporter                                                        | 89.5 | NR-8036 | G04 |
| FTN_0814 | <i>bioF</i> | COG0156H  | 8-amino-7-oxononanoate synthase                                               | 89.9 | NR-8041 | E11 |
| FTN_0513 | <i>glgB</i> | COG0296G  | glycogen branching protein                                                    | 90.0 | NR-8039 | F12 |
| FTN_0633 | <i>katG</i> | COG0376P  | peroxidase/catalase                                                           | 90.0 | NR-8052 | D04 |
| FTN_1273 | -           | COG0318IQ | long chain fatty acid CoA ligase                                              | 90.0 | NR-8048 | B09 |
| FTN_1252 | -           | COG3049M  | choloylglycine hydrolase family protein                                       | 90.3 | NR-8038 | E09 |
| FTN_1423 | <i>wbtG</i> | COG0438M  | group 1 glycosyl transferase                                                  | 90.4 | NR-8051 | F12 |
| FTN_0036 | <i>pyrD</i> | COG0167F  | dihydroorotate oxidase                                                        | 90.5 | NR-8037 | D06 |
| FTN_0561 | <i>apaH</i> | COG0639T  | diadenosine tetraphosphatase                                                  | 90.7 | NR-8039 | C12 |
| FTN_0120 | -           | COG0607P  | rhodanese-related sulfurtransferase                                           | 90.9 | NR-8050 | A04 |
| FTN_1310 | <i>pdpB</i> | COG3523S  | hypothetical protein FTN_1310                                                 | 90.9 | NR-8052 | A09 |

|          |             |           |                                                        |      |         |     |
|----------|-------------|-----------|--------------------------------------------------------|------|---------|-----|
| FTN_1325 | <i>pdpD</i> | -         | hypothetical protein FTN_1325                          | 91.1 | NR-8036 | F02 |
| FTN_1276 | -           | COG1566V  | membrane fusion protein                                | 91.5 | NR-8064 | C03 |
| FTN_1213 | -           | COG1215M  | glycosyl transferase family protein                    | 92.0 | NR-8037 | D07 |
| FTN_1518 | <i>relA</i> | COG0317TK | GDP pyrophosphokinase/GTP pyrophosphokinase            | 92.1 | NR-8040 | B02 |
| FTN_1322 | <i>iglC</i> | -         | intracellular growth locus protein C                   | 92.4 | NR-8048 | G02 |
| FTN_1357 | <i>recB</i> | COG1074L  | ATP-dependent exonuclease V subunit beta               | 92.4 | NR-8038 | H07 |
| FTN_1324 | <i>iglA</i> | COG3516S  | intracellular growth locus protein A                   | 92.8 | NR-8039 | C08 |
| FTN_1431 | <i>wbtA</i> | COG1086MG | dTDP-glucose 4,6-dehydratase                           | 92.8 | NR-8040 | G03 |
| FTN_0731 | -           | COG5006R  | hypothetical protein FTN_0731                          | 93.1 | NR-8037 | F11 |
| FTN_1257 | -           | -         | hypothetical protein FTN_1257                          | 93.3 | NR-8037 | B01 |
| FTN_1220 | -           | COG2148M  | lipopolysaccharide synthesis sugar transferase         | 93.6 | NR-8061 | G05 |
| FTN_0505 | <i>gcvT</i> | COG0404E  | glycine cleavage system aminomethyltransferase T       | 93.6 | NR-8037 | D04 |
| FTN_1743 | <i>clpB</i> | COG0542O  | chaperone clpB                                         | 93.7 | NR-8045 | F03 |
| FTN_0211 | <i>pcp</i>  | COG2039O  | pyrrolidone carboxylate peptidase                      | 93.9 | NR-8038 | B01 |
| FTN_0561 | <i>apaH</i> | COG0639T  | diadenosine tetraphosphatase                           | 93.9 | NR-8039 | C12 |
| FTN_1159 | <i>ggt</i>  | COG0405E  | gamma-glutamyltranspeptidase                           | 94.1 | NR-8051 | F06 |
| FTN_1762 | -           | COG0488R  | putative ABC transporter ATP-binding protein           | 94.1 | NR-8046 | E09 |
| FTN_1112 | <i>cphA</i> | COG0769M  | cyanophycin synthetase                                 | 94.1 | NR-8045 | H04 |
| FTN_1199 | -           | -         | hypothetical protein FTN_1199                          | 94.2 | NR-8038 | C05 |
| FTN_0823 | <i>pabA</i> | COG0512EH | anthranilate synthase component II                     | 94.2 | NR-8052 | B05 |
| FTN_1655 | <i>rluC</i> | COG0564J  | ribosomal large subunit pseudouridine synthase C       | 94.4 | NR-8038 | D08 |
| FTN_1682 | <i>frgA</i> | COG4264Q  | siderophore biosynthesis protein                       | 94.4 | NR-8038 | G04 |
| FTN_1410 | <i>bfr</i>  | COG2193P  | bacterioferritin                                       | 94.6 | NR-8047 | B12 |
| FTN_1417 | <i>manB</i> | COG1109G  | phosphomannomutase                                     | 94.7 | NR-8065 | F11 |
| FTN_1684 | -           | COG0019E  | diaminopimelate decarboxylase                          | 94.9 | NR-8045 | B09 |
| FTN_0720 | -           | COG1414K  | IclR family transcriptional regulator                  | 94.9 | NR-8038 | A11 |
| FTN_0265 | <i>rplQ</i> | COG0203J  | 50S ribosomal protein L17                              | 95.2 | NR-8037 | E11 |
| FTN_1602 | <i>deoB</i> | COG1015G  | phosphopentomutase                                     | 95.5 | NR-8038 | E05 |
| FTN_1255 | -           | COG1442M  | glycosyl transferase family protein                    | 95.7 | NR-8039 | C11 |
| FTN_0535 | -           | COG2814G  | drug:H <sup>+</sup> antiporter-1 (DHA1) family protein | 96.2 | NR-8038 | B04 |
| FTN_0815 | <i>bioB</i> | COG0502H  | biotin synthase                                        | 96.3 | NR-8037 | G05 |



|          |             |          |                                                                          |       |         |     |
|----------|-------------|----------|--------------------------------------------------------------------------|-------|---------|-----|
| FTN_1029 | -           | COG3155Q | isoprenoid biosynthesis protein with amidotransferase-like domain        | 96.3  | NR-8038 | F11 |
| FTN_1264 | <i>rluD</i> | COG0564J | ribosomal large subunit pseudouridine synthase D                         | 96.6  | NR-8038 | G05 |
| FTN_1683 | -           | COG2814G | drug:H <sup>+</sup> antiporter-1 (DHA1) family protein                   | 96.7  | NR-8037 | G08 |
| FTN_1254 | -           | -        | hypothetical protein FTN_1254                                            | 97.2  | NR-8036 | H07 |
| FTN_1608 | <i>dsbB</i> | COG1495O | disulfide bond formation protein                                         | 97.2  | NR-8039 | A10 |
| FTN_0035 | <i>pyrF</i> | COG0284F | orotidine-5'-phosphate decarboxylase                                     | 97.3  | NR-8038 | D10 |
| FTN_0196 | <i>cyoB</i> | COG0843C | cytochrome bo terminal oxidase subunit I                                 | 98.0  | NR-8039 | B03 |
| FTN_0504 | -           | COG1982E | lysine decarboxylase                                                     | 98.8  | NR-8039 | B11 |
| FTN_1683 | -           | COG2814G | drug:H <sup>+</sup> antiporter-1 (DHA1) family protein                   | 98.9  | NR-8052 | E12 |
| FTN_1212 | -           | COG0438M | glycosyl transferases group 1 family protein                             | 99.1  | NR-8039 | F08 |
| FTN_0893 | -           | -        | hypothetical protein FTN_0893                                            | 99.4  | NR-8037 | E12 |
| FTN_1423 | <i>wbtG</i> | COG0438M | group 1 glycosyl transferase                                             | 99.4  | NR-8037 | A12 |
| FTN_0198 | <i>cyoD</i> | COG3125C | cytochrome bo terminal oxidase subunit IV                                | 99.9  | NR-8046 | F12 |
| FTN_0421 | <i>purN</i> | COG0299F | phosphoribosylglycinamide formyltransferase                              | 100.6 | NR-8038 | C03 |
| FTN_0813 | <i>bioC</i> | -        | biotin synthesis protein BioC                                            | 101.2 | NR-8038 | H12 |
| FTN_0998 | -           | COG2898S | potassium channel protein                                                | 101.2 | NR-8039 | D11 |
| FTN_1320 | -           | -        | hypothetical protein FTN_1320                                            | 101.2 | NR-8037 | H05 |
| FTN_0487 | <i>rpsU</i> | COG0828J | 30S ribosomal protein S21                                                | 101.4 | NR-8038 | A01 |
| FTN_1217 | -           | COG1132V | ABC transporter ATP-binding protein                                      | 101.4 | NR-8038 | G03 |
| FTN_1309 | <i>pdpA</i> | -        | hypothetical protein FTN_1309                                            | 101.4 | NR-8039 | D04 |
| FTN_1433 | -           | -        | hypothetical protein FTN_1433                                            | 104.8 | NR-8039 | F07 |
| FTN_1131 | <i>putA</i> | COG4230C | bifunctional proline dehydrogenase/pyrroline-5-carboxylate dehydrogenase | 105.4 | NR-8038 | G10 |
| FTN_1412 | -           | COG0202K | DNA-directed RNA polymerase subunit alpha                                | 105.4 | NR-8038 | D11 |
| FTN_1417 | <i>manB</i> | COG1109G | phosphomannomutase                                                       | 105.9 | NR-8050 | G02 |
| FTN_1314 | -           | -        | hypothetical protein FTN_1314                                            | 111.5 | NR-8037 | G10 |
| FTN_1309 | <i>pdpA</i> | -        | hypothetical protein FTN_1309                                            | 123.5 | NR-8039 | F04 |

**Supplemental Table 3. Primers used in this study**

| <b><i>Primer name</i></b> | <b><i>Sequence</i></b>                       |
|---------------------------|----------------------------------------------|
| 0109 Arm1 FWD             | caccagttttaaagaggt                           |
| 0109 Arm 1 REV            | ttatcgataccgtcgacctcactaaatttccatgatttaataac |
| 0109 frt_sKAN_frt FWD     | gttattaaatcatggaaatttagtgaggctgacggatcgataa  |
| 0109 frt_sKAN_frt REV     | ttatttaggattacttatttaatttgcatactgacggatcgata |
| 0109 Arm 2 FWD            | tatcgatcctgcagctatgcaaattaaataagtaatcctaataa |
| 0109 Arm 2 REV            | ttcctataggcaacattga                          |
| 0430 Arm1 FWD             | ttacttagatactctagctg                         |
| 0430 Arm 1 REV            | ttatcgataccgtcgacctctagtattacctgttatttcatta  |
| 0430 frt_sKAN_frt FWD     | taatgaataaacaggttaatactagaggctgacggatcgataa  |
| 0430 frt_sKAN_frt REV     | tcttataaaaagacggcaaaaagcatagctgacggatcgata   |
| 0430 Arm 2 FWD            | tatcgatcctgcagctatgctttttgccgtcttttataaga    |
| 0430 Arm 2 REV            | aaaatcgtactgctttagaat                        |
